1 **Title:** Twitching cells use a chemoreceptor to detect bacterial competitors

2

3

4 **Authors:** Kaitlin D. Yarrington<sup>1</sup>, Tyler N. Shendruk<sup>2</sup>, and Dominique H. Limoli<sup>\*</sup>

5 <sup>1</sup>Department of Microbiology and Immunology, Carver College of Medicine, University of Iowa, Iowa City, IA, United  
6 States

7 <sup>2</sup>School of Physics and Astronomy, The University of Edinburgh, Edinburgh EH9 3FD, United Kingdom

8

9 <sup>\*</sup>Corresponding author: dominique-limoli@uiowa.edu

10

11

12 **Abstract:**

13 Bacteria live in cosmopolitan communities, where the ability to sense and respond to interspecies and  
14 environmental signals is critical for survival. We previously showed the pathogen *Pseudomonas aeruginosa* detects  
15 secreted peptides from bacterial competitors and navigates interspecies signal gradients using pilus-based motility.  
16 Yet, it remained unknown whether *P. aeruginosa* utilizes a designated chemosensory system for this behavior.  
17 Here, we performed a comprehensive genetic analysis of a putative pilus chemosensory system to reveal behaviors  
18 of mutants that retain motility, but are blind to interspecies signals. The enzymes predicted to methylate (PilK) and  
19 demethylate (ChpB) the putative pilus chemoreceptor, PilJ, are necessary for cells to control the direction of  
20 migration. While these findings implicate PilJ as a *bona fide* chemoreceptor, such function had yet to be  
21 experimentally defined, as PilJ is essential for motility. Thus, we constructed systematic genetic modifications of  
22 PilJ and found that without the predicted ligand binding domains or methylation sites cells lose the ability to detect  
23 competitor gradients, despite retaining pilus-mediated motility. Collectively, this work uncovers the chemosensory  
24 nature of PilJ, providing insight into chemotactic interactions necessary for bacterial survival in polymicrobial  
25 communities and revealing putative pathways where therapeutic intervention might disrupt bacterial  
26 communication.

## 27 **Introduction**

28 Microbes often exist in complex, dynamic environments and have evolved sophisticated systems to perceive and  
29 respond to the outside world. Because they commonly reside in multispecies communities, bacteria experience  
30 gradients of nutrients, metabolites, and secretions generated by neighboring cells. Gradients are particularly steep  
31 in surface-attached biofilm communities and ecological theory predicts bacteria must sense and respond to  
32 competitor and cooperator signals to thrive in such complex environments (Foster & Bell, 2012; Oliveira et al.,  
33 2016).

34  
35 In line with this hypothesis, we recently reported that *Pseudomonas aeruginosa* is attracted to gradients of secreted  
36 factors from other microbial species (Limoli et al., 2019). *Pseudomonads* are opportunistic bacteria found in  
37 polymicrobial communities in soil, wounds, and chronic lung infections, such as those in people with cystic fibrosis  
38 (Limoli & Hoffman, 2019; Tashiro et al., 2013). *P. aeruginosa* is frequently co-isolated with *Staphylococcus aureus*  
39 from cystic fibrosis respiratory samples and coinfections can persist for decades (Deleon et al., 2014; Gabriliska &  
40 Rumbaugh, 2015; Hotterbeekx et al., 2017; Limoli & Hoffman, 2019). Coinfection is also associated with pulmonary  
41 decline; thus, understanding ecological competition between these organisms may provide insight into patient  
42 outcomes (Hubert et al., 2013; Limoli et al., 2016; Maliniak et al., 2016).

43  
44 Accordingly, *in vitro* studies have documented interspecies interactions between *P. aeruginosa* and *S. aureus*  
45 leading to reciprocal enhancement of antibiotic tolerance, production of virulence factors, and ability to alter host  
46 immune cell responses, further supporting clinical observations (Limoli & Hoffman, 2019; Orazi et al., 2020; Orazi  
47 & O'Toole, 2017; Orazi et al., 2019). Additionally, these data suggest each species may sense a secreted signal  
48 from the other, which instigates a competitive or cooperative response through alteration of their virulence arsenals,  
49 a model supported by differential regulation of specific *P. aeruginosa* virulence pathways in response to *S. aureus*  
50 exoproducts (Kvich et al., 2022; Zarrella & Khare, 2022). Remarkably, *P. aeruginosa* and *S. aureus* have been  
51 shown to form mixed microcolonies when cocultured on bronchial epithelial cells (Orazi & O'Toole, 2017). One  
52 possible explanation for the formation of mixed communities is that *P. aeruginosa* and *S. aureus* may be initially  
53 attracted to one another through detection of secreted interspecies signals. Such attraction has the potential to  
54 facilitate formation of blended microcolonies or microbial competition, depending on the environmental conditions.

55  
56 Supporting this model, *P. aeruginosa* senses secreted *Staphylococcal* peptide toxins referred to as phenol soluble  
57 modulins (PSMs) and responds with directed motility towards the increasing PSM concentration gradient, mediated  
58 by the type IV pilus (TFP) (Limoli et al., 2019). With the identification of a putative interspecies chemoattractant for  
59 pilus-based motility, we hypothesized that *P. aeruginosa* uses a chemosensory pathway to move towards *S. aureus*.  
60 TFP-mediated motility, or twitching motility, occurs through the grappling hook activity of the pilus, which undergoes  
61 episodes of extension, substrate attachment and retraction which pulls the cell body along the surface (Burrows,  
62 2012). The direction of twitching motility is thought to be controlled by preferential extension of pili at the pole facing  
63 the direction of movement, referred to as the leading pole. Cells are predicted to change direction by extending pili  
64 from the opposite pole, reversing the direction of cellular movement along the long axis of the cell body and so  
65 swapping leading poles (Kühn et al., 2021). However, whether modulation of reversal frequency is necessary and

66 sufficient to bias the movement of twitching cells towards a chemoattractant, similar to the run-and-tumble or run-  
67 reverse-turn strategies used in flagella-mediated chemotaxis, remains unknown (Qian et al., 2013). While planktonic  
68 swimming cells smoothly sample gentle chemoattractant gradients by typically traveling a full body length or more  
69 between tumbling events, surface-associated twitching motility is hundreds to thousands of times slower and steep,  
70 varying gradients characterize the chemotactic landscape (Berg & Brown, 1972; Patteson et al., 2015). Thus,  
71 twitching cells experience less certain chemotactic signals (Carabelli et al., 2020; Hook et al., 2019; Oliveira et al.,  
72 2016). Thus, we predict that additional parameters need to be considered to fully understand how a twitching  
73 community biases directional movement. Indeed, even simple models of twitching motility are known to produce  
74 complex dynamics (Nagel et al., 2020).

75  
76 While TFP-mediated chemotaxis has not been thoroughly dissected in *P. aeruginosa*, prior work has described  
77 chemotactic roles for the two proteins of the putative pilus chemosensory system, Pil-Chp (Kühn et al., 2021;  
78 Oliveira et al., 2016). Namely, the predicted response regulators, PilG and PilH, are thought to control reversals  
79 and increase levels of the intracellular second messenger cyclic adenosine monophosphate (cAMP) through PilG  
80 direct activation of the adenylate cyclase CyaB (Fulcher et al., 2010; Kühn et al., 2021; Oliveira et al., 2016; Persat  
81 et al., 2015). cAMP controls a large arsenal of virulence factors targeting both eukaryotic and prokaryotic cells, as  
82 well as multiple modes of motility through activation of the virulence response transcriptional regulator (Vfr)  
83 (Wolfgang et al., 2003). However, whether cAMP is also necessary to transduce the detection of interspecies  
84 attractants to modulate directional motility has not been investigated.

85  
86 In addition, Pil-Chp includes homologous proteins to a majority of the Chel flagella chemotaxis system in *P.*  
87 *aeruginosa* (Matilla et al., 2021; Sampedro et al., 2015). However, unlike the 24 Chel-associated chemoreceptors,  
88 referred to as methyl-accepting chemotaxis proteins (MCPs), Pil-Chp only has one MCP, called PilJ. This putative  
89 pilus chemoreceptor differs from the flagella systems, in that PilJ is uniquely essential for twitching motility and  
90 possesses low protein sequence similarity in both the ligand binding domain (LBD) and cytoplasmic signaling  
91 domains with other MCPs (Delange et al., 2007; Matilla et al., 2021). The chemoreceptor for this system and the  
92 chemotactic role of the rest of the pathway has yet to be fully interrogated.

93  
94 To determine the contribution of the remaining proteins encoded within the Pil-Chp pathway, we systematically  
95 deleted these genes and identified those mutants that retain twitching yet are unable to bias movement up a gradient  
96 of *S. aureus* secreted factors. From this analysis, six genes fit these criteria: *pilK*, *chpB*, *chpC*, *pilH*, *cyaB*, and *cpdA*.  
97 ChpC is a CheW-like linker protein and PilH is a response regulator, while CyaB and CpdA are enzymes that  
98 synthesize and degrade cAMP, respectively. PilK and ChpB are proteins that control chemoreceptor adaptation  
99 through methylation of the Pil-Chp MCP PilJ, implicating a role for PilJ as a chemoreceptor for interspecies signals.  
100 Accordingly, PilJ mutations in the key regions that define an MCP, including the LBD for sensing interspecies signals  
101 and methylation sites for chemoreceptor adaptation, revealed PilJ is necessary for *P. aeruginosa* to perceive and  
102 bias movements towards *S. aureus*. Quantification of cAMP in single cells also reveals that cAMP levels rise in *P.*  
103 *aeruginosa* during chemotaxis towards *S. aureus*; yet cAMP increases are not strictly due to enhanced twitching

104 motility. Collectively, these results define a novel chemosensory role for PilJ and the Pil-Chp system to sense and  
105 respond to interspecies signals.

106 **Results: The Pil-Chp system controls *P. aeruginosa* attraction to *S. aureus* peptides**

107 The directional nature of *P. aeruginosa* movement up a gradient of *S. aureus* secreted peptides suggests a role for  
108 a chemosensory network. We hypothesize that Pil-Chp controls a chemotaxis-like TFP-mediated response by *P.*  
109 *aeruginosa* towards *S. aureus*. To test this hypothesis, we systematically deleted genes in several components of  
110 the Pil-Chp pathway to identify mutants that retain twitching motility, but show diminished directional response to *S.*  
111 *aureus*, using a macroscopic directional motility assay (Figure 1A, B) (Kearns et al., 2001; Limoli et al., 2019).  
112 Growth medium or cell-free *S. aureus* supernatant was spotted on top of an agar plate and allowed to diffuse for 24  
113 hours to form a gradient. *P. aeruginosa* was then spotted at a distance from the gradient and allowed to respond to  
114 each gradient for 36 hours before imaging the plates and quantifying the directional motility ratio (Figure 1C). Four  
115 of the 16 pilus mutants retain twitching motility, but reduced directional motility up a gradient of *S. aureus* secreted  
116 signals (Figure 1D, E). The remaining mutants either phenocopy wildtype or are non-motile (Figure 1A,B). Mutants  
117 with reduced ability to respond include genes that encode for the predicted methyltransferase PilK and  
118 methylesterase ChpB. The other two have modification of the chemoreceptor ChpC, which is a CheW-like linker  
119 protein that connects the chemoreceptor and kinase, and PilH, which is a response regulator that is predicted to  
120 regulate pilus retraction (Darzins, 1994, 2006; Whitchurch et al., 2004). These four mutants indicate that *P.*  
121 *aeruginosa* uses the Pil-Chp system for a pilus-mediated chemotaxis response to *S. aureus*. Yet how these  
122 chemotaxis-deficient mutants control *P. aeruginosa* attraction towards *S. aureus* is not precisely defined by  
123 macroscopic directional motility assays.

124



140 **Results: Methyl modification proteins for chemotaxis adaption are necessary for full directional TFP-**  
141 **mediated motility towards *S. aureus***

142 Since both predicted adaption proteins for chemoreceptor methylation modification are necessary for full response  
143 to *S. aureus* peptides at the community level, we next investigated the behavior of each mutant at the single-cell  
144 level to uncover how each mutant is unable to correctly bias the direction of movement. PilK is predicted to  
145 methylate, while ChpB is predicted to demethylate, PilJ (Figures 1A, 2A). For other MCPs, the addition and removal  
146 of methyl groups to a chemoreceptor, facilitates intracellular signal transmission to the downstream kinase to shift  
147 activity to an 'ON' or 'OFF' state, while also inducing conformational changes to the ligand binding region of the  
148 MCP that alters its sensitivity to signals as the bacterial cell moves up or down a gradient (Parkinson et al., 2015).  
149 Higher levels of MCP methylation, facilitated by PilK, are thus expected to shift kinase activity ON and subsequently  
150 increase Pil-Chp control of pilus extension and retraction, while hydrolysis of methylated sites by ChpB is expected  
151 to shift kinase activity towards an OFF state, with a reduction in controlled pilus dynamics (Figure 2A).

152  
153 Based on the information above, we predicted that cells lacking PilK would have low methylated PilJ, while those  
154 lacking ChpB would have highly methylated PilJ. Thus, both are predicted to be unable to properly transmit  
155 intracellular signals to control activity of kinase ChpA and subsequently the response regulators, ultimately resulting  
156 in altered control over biased extension and retraction events for motility (Figure 2A). Macroscopically, the *chpB*  
157 mutant, which presumably has high methylation and thus a shifted-ON kinase state, exhibits a decrease in  
158 directional movement up the *S. aureus* secreted factor gradient which is restored when *chpB* is complemented  
159 (Figure 1, Figure 2 – figure supplement 1). To uncover how  $\Delta chpB$  fails to move fully towards *S. aureus* signals, we  
160 evaluated single-cell TFP-mediated motility behaviors of  $\Delta chpB$  in the absence and presence of *S. aureus*.  
161 Compared to wildtype *P. aeruginosa*, in both monoculture and coculture, the  $\Delta chpB$  mutant exhibits earlier motility  
162 away from the growing microcolony, with groups of motile cells migrating outwards in all directions (Videos 1-4). In  
163 coculture with *S. aureus*, some cells migrate towards *S. aureus*; however, similar numbers of cells move in the  
164 opposite directions, suggesting  $\Delta chpB$  cells are unable to bias movements towards the interspecies signals, unlike  
165 wildtype, which shows stronger apparent bias with more cells moving towards *S. aureus* (Video 4). To quantify  
166 these behaviors, we determined the direction of motion for each *P. aeruginosa* cell in relation to the position of *S.*  
167 *aureus* cells. Rose graphs of the principal angles of motility for each *P. aeruginosa* cell trajectory, reveal that most  
168 wildtype cells bias their collective direction of movement towards *S. aureus*, whereas  $\Delta chpB$  cells are prone to move  
169 both towards and away from *S. aureus* (Figure 2B, inset).

170  
171 To determine the aspects of *P. aeruginosa* movement that contribute to biased motion towards *S. aureus*, the  
172 dynamics were quantified by the mean-squared displacement (MSD), a measure of the typical distance traveled  
173 over a given time  $\Delta t$  (Figure 2B). While MSD measurements commonly assume isotropic motion, we decomposed  
174 microscopic cell migration into components parallel ( $\parallel$ ) and perpendicular ( $\perp$ ) to each trajectory's principal direction.  
175 While wildtype cells travel comparable distances in the parallel and perpendicular directions, only significantly  
176 different at the longest lag times, they have different dynamics in the two directions (Figure 2B, left). Perpendicular  
177 to the principal direction, the cells perform an unbiased random walk, which is quantified by fitting the anomalous  
178 diffusion exponent (Methods and Materials; Eq 4) and finding  $\alpha_{\perp} \approx 1.1$ , which is close to the expected value of 1 for



179 diffusive dynamics. However, in the parallel direction, the anomalous exponent  $\alpha_{||}=1.3$ . This larger value suggests  
180 that cells tend to move with more self-directed, propulsive transport in the parallel direction.

181  
182 In comparison to wildtype, cells lacking ChpB exhibit markedly different MSD profiles.  $\Delta chpB$  cells have significantly  
183 larger displacements in the parallel direction than perpendicular (Figure 2B, middle). However, this increased  
184 microscopic motion does not translate into directional motility, since the anomalous diffusion exponent is near unity,  
185  $\alpha_{||}=1.1$ , which suggests diffusive random walk dynamics. The combination of increased MSD but loss of self-  
186 directed, propulsive transport compared to wildtype is consistent with ChpA kinase activity more often in the ON  
187 state. Given the predicted chemotactic role for Pil-Chp, one possible explanation for reduced bias towards *S. aureus*  
188 is that  $\Delta chpB$  cells have increased rates of cellular reversals. Reversing, or changing the direction of type IV pilus-  
189 mediated movements, is thought to require switching of the leading and lagging poles. These cellular reversals also  
190 enable bacteria to bias the direction of type IV pilus-mediated movement up an increasing concentration gradient  
191 of chemoattractant (Oliveira et al., 2016). However, single-cell tracking analyses under these conditions did not  
192 show statistically significantly different reversal dynamics between  $\Delta chpB$  and wildtype. Therefore, if pole switching  
193 reversals do not explain how cells can perform TFP-mediated chemotaxis towards interspecies signals, then how  
194 are cells able to bias their movements up a gradient?

195  
196 To understand how directional motility arises from the microscopic dynamics, we considered the displacement  
197 distribution function, which gives the probability that a cell moves a given displacement over a given lag time (Figure  
198 2 - figure supplement 3). The probability density functions of displacements made by *P. aeruginosa* cells are  
199 dominated by a narrow peak of submicron jiggling motion. While imaging introduces narrow Gaussian noise (Figure  
200 2 - figure supplement 4A), the submicron peak is observed to be wider and exponentially distributed (Figure 2 -  
201 figure supplement 4B). Neither jiggling, nor rare-but-large steps, show substantial differences parallel or  
202 perpendicular to the principal direction of motion for wildtype cells. The dynamics leading to directional motility in  
203 wildtype cells become apparent once the trajectories are divided into subpopulations of “movers” and “resters” (see  
204 Methods and Materials). While resters exhibit displacement distributions with only jiggling, movers  
205 possess a pair of non-zero sharp-shoulder peaked step sizes in the direction parallel to the principal angle (Figure  
206 2C, red regions). These peaks represent a well-defined step size of  $0.69 \pm 0.01 \mu\text{m}$  at the shortest lag times. For  
207 wildtype cells, these sharp peaks are found at step sizes of nearly one micron for all lag times and exist in both the  
208 parallel and perpendicular directions but are entirely absent in resters. The peak step size is larger in the parallel  
209 direction than the perpendicular direction (Figure 2 - figure supplement 3, top row), explaining the anisotropic motion  
210 and single-cell directional motility, but not bias towards *S. aureus*. The bias occurs because the symmetry between  
211 the forward and backward peaks breaks with increasing lag time, with the forward (positive, parallel) peak shifting  
212 to slightly larger step sizes and the backward (negative, antiparallel) peak shifting to slightly smaller values and  
213 eventually vanishing at the largest lag times (Figure 2C, left, inset). The probability distributions at different time  
214 lags reveal the microscopic basis of the directed motility of wildtype *P. aeruginosa* towards *S. aureus* and the  
215 difference between these peak step sizes explains the superdiffusive anomalous exponent. Comparison of wildtype  
216 and  $\Delta chpB$  step sizes show that both strains exhibit the dominant submicron jiggling peak with no selected direction  
217 much of the time (Figure 2C). However, the peak step size can no longer be distinguished in  $\Delta chpB$  (Figure 2C,



218 middle, red region). This suggests an apparent loss of directional TFP-mediated dynamics and is consistent with  
219 the reduced macroscopic directional motility observed in  $\Delta chpB$  (Figure 1D, E).

220

221 Given that reduced pilus-mediated chemotaxis of  $\Delta chpB$  can be explained by a loss of the peak step size in the  
222 parallel direction, we next live-imaged  $\Delta pilK$  and tracked cells to evaluate whether  $\Delta pilK$  exhibits similar reduction  
223 in bias, thus explaining the modest macroscopic chemotaxis deficiency. Observations of  $\Delta pilK$  in monoculture and  
224 coculture with *S. aureus* show similar, but bimodal phenotypes. While 50% of  $\Delta pilK$  microcolonies imaged show  
225 hypermotile single-cells or small packs of cells moving outwards in all directions from the growing microcolony,  
226 regardless of where *S. aureus* is in coculture, the other 50% of imaged  $\Delta pilK$  microcolonies do not show any motility  
227 (Figure 2 – figure supplement 2, Videos 5-8). When motile,  $\Delta pilK$  cells disperse from the microcolony later than  
228  $\Delta chpB$  but earlier than wildtype (Video 6). Compared to  $\Delta chpB$  cells that tend to move as clusters of cells in tendrill-  
229 like patterns away from the microcolony,  $\Delta pilK$  cells more frequently move in smaller groups or strictly as single  
230 cells and spread outwards radially (Videos 6 and 8). Regardless, complementation of the  $\Delta pilK$  mutant restores  
231 chemotaxis response to wildtype levels (Figure 2 – figure supplement 1). The tracking analyses show that  $\Delta pilK$   
232 MSD is comparable to wildtype but the parallel anomalous exponent  $\alpha_{||}=1.1$  is closer to the diffusive random walk  
233 value of  $\Delta chpB$  (Figure 2B, right). Similarly, like  $\Delta chpB$ ,  $\Delta pilK$  has largely lost the peak step size (Figure 2C, right).  
234 Compared to  $\Delta chpB$ , the remnant of the peak step size may be discerned (Figure 2C, right, red region); however,  
235 they are indefinite and the larger step size of  $1.57 \pm 0.02 \mu\text{m}$  at the shortest lag times may also be present (Figure  
236 2 - figure supplement 3, middle row).

237

238 Collectively, the bimodal nature of  $\Delta pilK$  motility and phenotype of  $\Delta chpB$  suggest that *P. aeruginosa* cells can lose  
239 control of directional pilus-mediated motility dynamics in two ways. Cells with too much ChpA kinase activity, such  
240 as  $\Delta chpB$ , move far without precise control over direction and resulting in persistent movement in the initial direction  
241 of movement, resulting in larger displacement than wildtype. In contrast, cells with loss of PilJ-mediated ChpA  
242 kinase activity, like  $\Delta pilK$ , are unable to control pilus dynamics and thus are more susceptible to environmental  
243 conditions, which leads to either the inability to move or uncontrollable, short movements away from the  
244 microcolony. This is further exemplified for  $\Delta pilK$  when multiple microcolonies from four separate cultures were  
245 simultaneously imaged and retain the bimodal distribution of motility (Figure 2 – figure supplement 2). Whether  
246 persisting longer or spreading, neither  $\Delta chpB$  nor  $\Delta pilK$  can chemotax towards interspecies signals, supporting the  
247 model that proper methylation and demethylation of chemoreceptor PilJ is an essential component of pilus-mediated  
248 chemotaxis.

249

250 We previously reported that PilJ was not necessary for *P. aeruginosa* to bias movement towards *S. aureus* (Limoli  
251 et al., 2019). However, these data reveal a role for two enzymes predicted to modify PilJ; thus, we revisited the  
252 necessity of PilJ in interspecies signaling here. One hypothesis for the prior observations was that motile  $\Delta pilJ$  cells  
253 were using flagella-mediated motility, which obscured the pilus-mediated defect. To test this hypothesis, we  
254 generated a mutant lacking both *pilJ* and *flgK*, the flagellar hook; therefore, this mutant was not able to use flagella-  
255 mediated motility (O'Toole & Kolter, 1998). Live-imaging shows that  $\Delta pilJ \Delta flgK$  cells are non-motile and thus fully

256 non-responsive to *S. aureus*, suggesting that previously it was flagella-mediated motility interfering with evaluation  
257 of pilus-mediated response to *S. aureus* (Figure 2 – video 1). Additionally, as shown prior with a  $\Delta pilA \Delta flgK$  mutant,  
258 which similarly lacked functional pili and flagella,  $\Delta pilJ \Delta flgK$  cells are unable to remain in a clustered microcolony  
259 at later time points (Figure 2 – video 1) (Limoli et al., 2019). To test that  $\Delta chpB$  and  $\Delta pilK$  phenotypes at the single-  
260 cell level were not due to flagella-mediated motility as well, we generated  $\Delta chpB \Delta flgK$  and  $\Delta pilK \Delta flgK$  mutants and  
261 live-imaged each in monoculture. Both of these mutants phenocopy the behaviors of their respective parental single  
262 mutant strains (Figure 2 – videos 2-4).

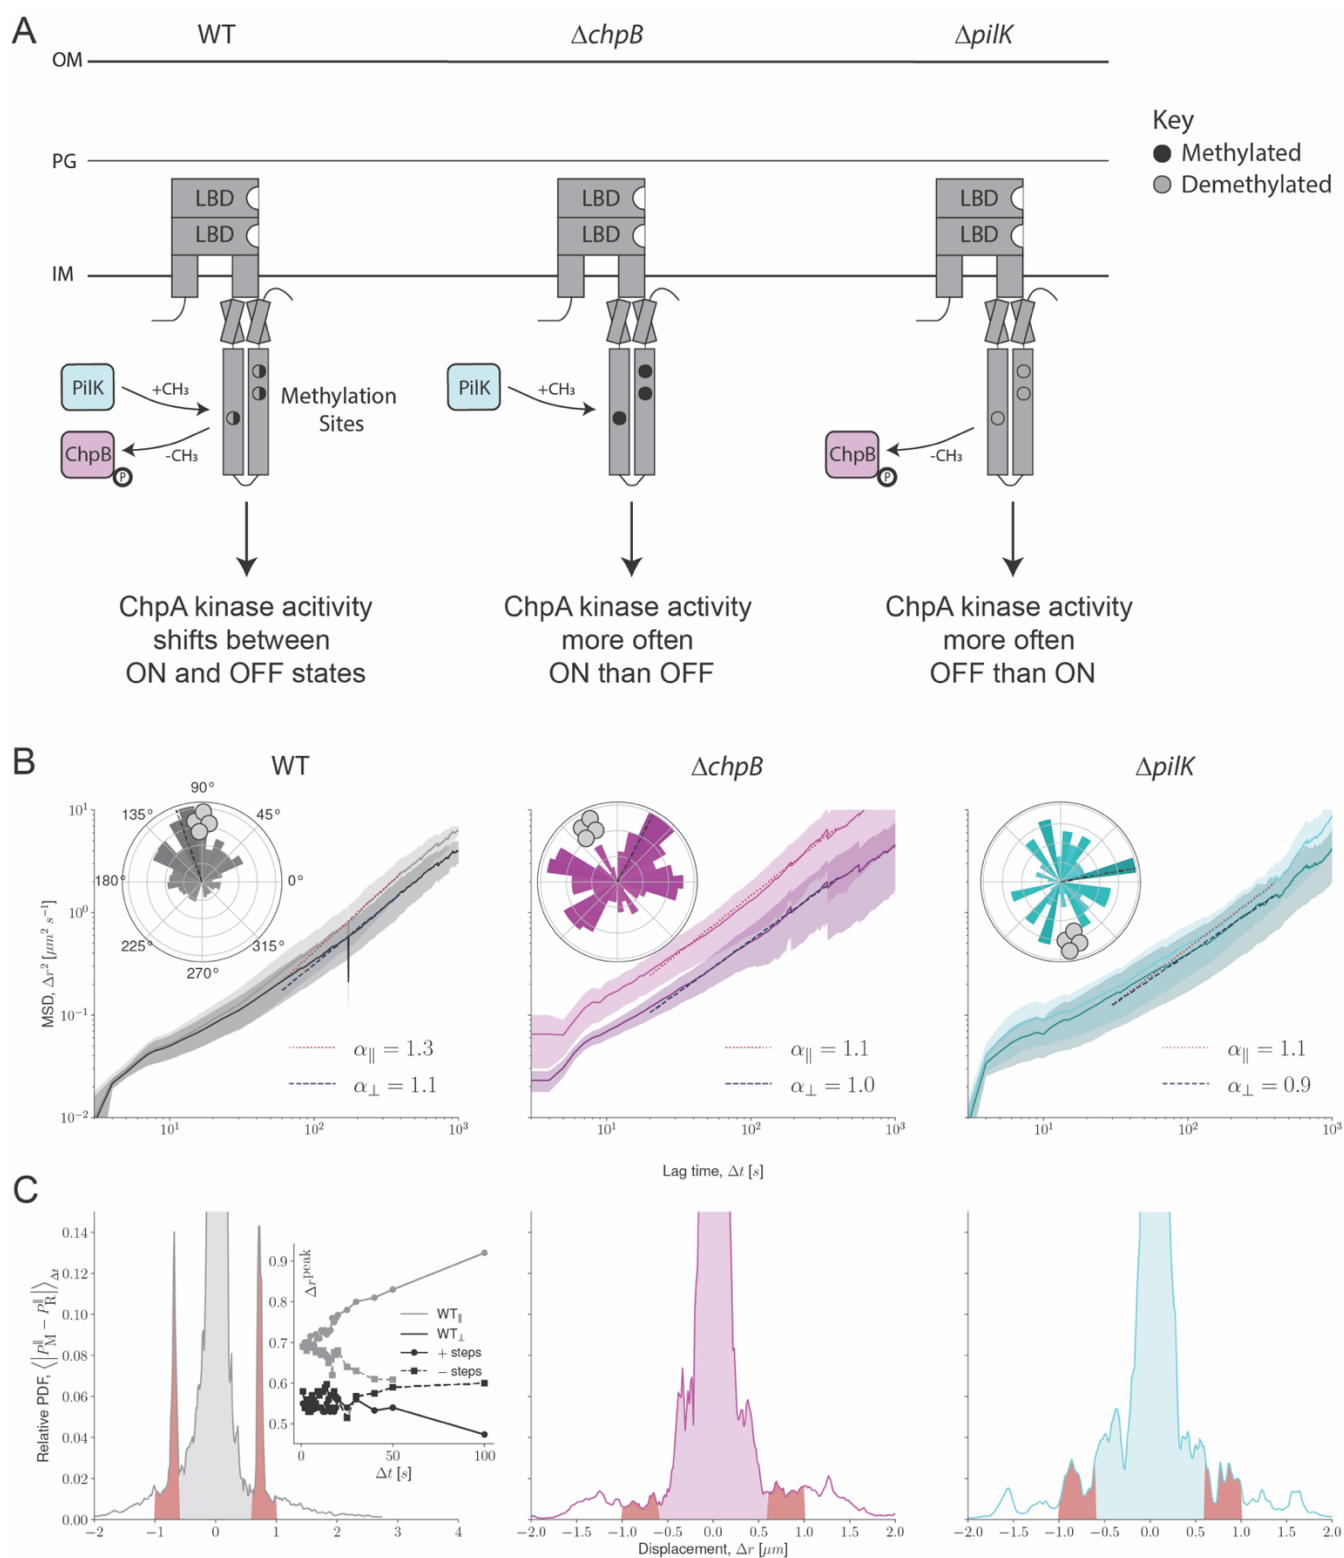

263

264

265

266

267

268

**Figure 2. Methyl modification proteins for chemotaxis adaption are necessary for full directional TFP-mediated motility towards *S. aureus*.** (A) Schematic of *P. aeruginosa* MCP protein PilJ and methyl modification proteins PilK and ChpB. The predicted methylation sites with cytoplasmic domain of PilJ are represented by the black and gray circles. In wildtype, PilJ is predicted to undergo methylation and demethylation; thus, ChpA kinase activity switches between ON and OFF states (left). In the absence of *chpB*, PilJ is expected to have high

269 methylation (filled, black circles) and therefore ChpA kinase activity shifted ON (middle). In the absence of *pilK*, PilJ  
270 is expected to have low methylation (empty, gray circles) and therefore ChpA kinase activity shifted OFF (right). (B)  
271 Mean-squared displacements (MSD) for the parallel ( $\parallel$ ) and perpendicular ( $\perp$ ) directions of wildtype,  $\Delta chpB$ , and  
272  $\Delta pilK$ . The anomalous diffusion exponent ( $\alpha$ ) for each MSD is shown. Insets show the rose graphs of the principal  
273 angle of motility for each cell trajectory relative to starting position for *P. aeruginosa* wildtype,  $\Delta chpB$ , and  $\Delta pilK$   
274 coculture with *S. aureus*. Position of *S. aureus* relative to the center of the *P. aeruginosa* microcolony is represented  
275 by the gray cocci on the perimeter. Trajectory angles are shown by colored vectors with the average angle of all  
276 trajectories represented by the dotted black line. Larger vectors indicate more cells for the given principal angle.  
277 One rose graph representative of at least three replicates is shown. (C) Relative distributions of parallel component  
278 step displacements ( $\Delta r$ ) of wildtype,  $\Delta chpB$ , and  $\Delta pilK$  cells. Relative distributions are the absolute difference  
279 between probability density functions (PDF) of movers and resters, averaged over lag times  $\Delta t \leq 20$  seconds. The  
280 red regions highlight the non-zero sharp-shouldered peak step size between  $0.6 \mu m \leq |\Delta r| \leq 1.0 \mu m$ . The inset  
281 shows the location of the peak step size for wildtype movers over increasing lag times for forward and backwards  
282 steps in both parallel and perpendicular directions.  
283  
284

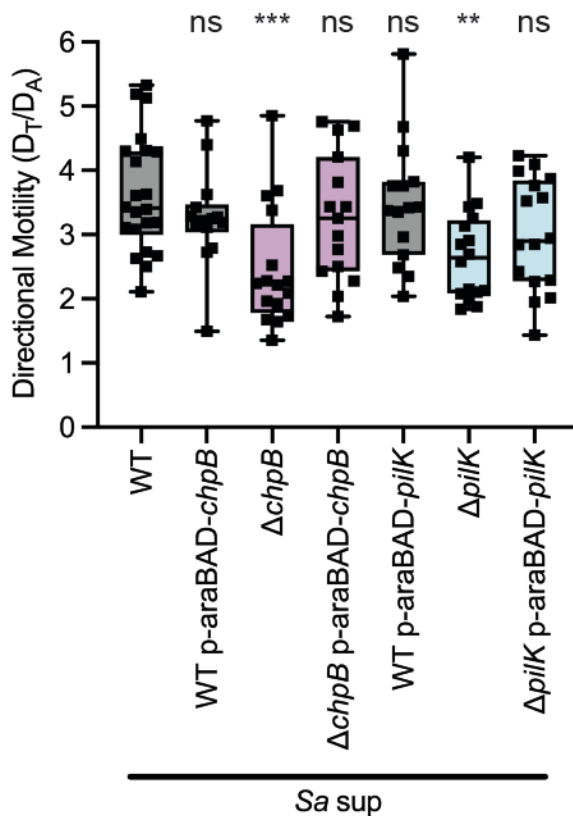

285  
286 **Figure 2 – Figure supplement 1. Complementing  $\Delta pilK$ , and  $\Delta chpB$  restores pilus-mediated chemotaxis.**  
287 Directional motility towards *S. aureus* secreted factors of wildtype,  $\Delta pilK$ , and  $\Delta chpB$  with and without  
288 complementing plasmids carrying arabinose-inducible copies of *pilK* or *chpB*. Complemented strains were induced  
289 with 0.2% arabinose; however, phenotypes were the same in the absence of induction. Directional motility for at  
290 least four biological replicates, each containing a minimum of three technical replicates are shown. Statistical

291 significance was determined with a one-way ANOVA followed by Dunnett's multiple comparisons test. \*\*\* indicates  
292  $p < 0.001$ ; \*\* indicates  $p < 0.01$ ; *ns* indicates no statistically significant difference.  
293

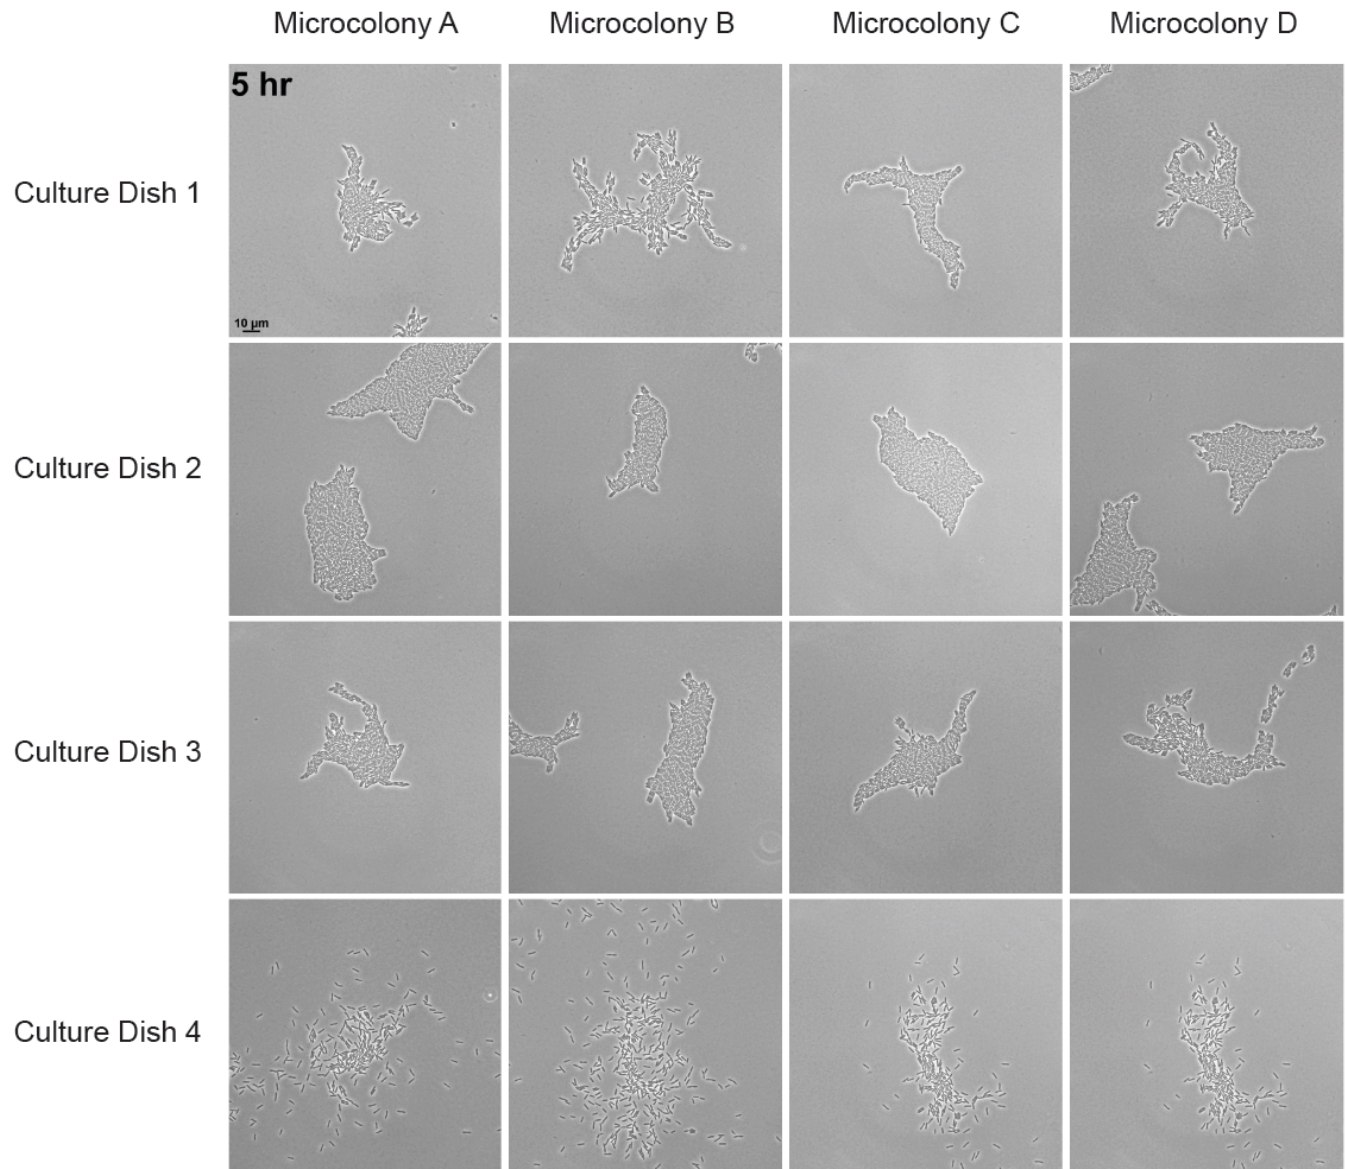

294  
295 **Figure 2 – Figure supplement 2. *P. aeruginosa*  $\Delta$ *pilK* has bimodal pilus-mediated motility.** Separate  $\Delta$ *pilK*  
296 cultures plated onto four individual experimental dishes and four fields of view in each culture dish were  
297 simultaneously imaged at 5 hours post-inoculation. Agarose pads were made from the same media and dried under  
298 the same conditions at the same time. A range in motility phenotypes are seen between all microcolonies imaged.



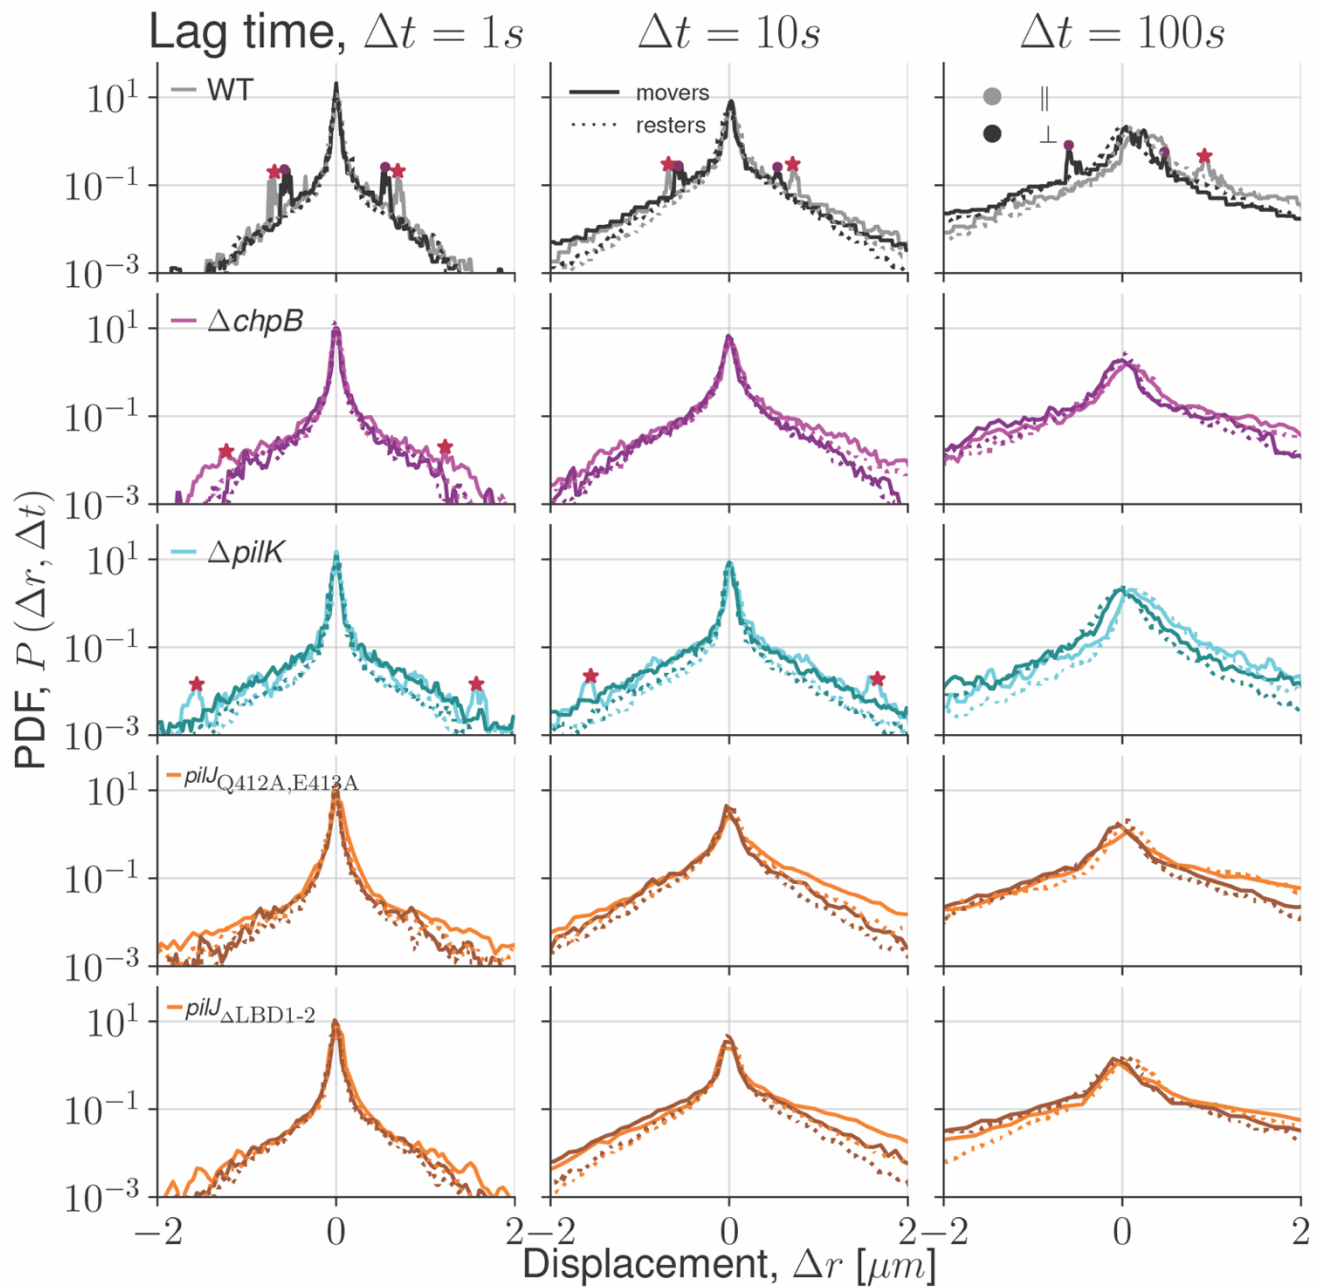

299

300

301

302

303

304

305

**Figure 2 – figure supplement 3. Van Hove distributions for all mutants.** Step size distributions for each *P. aeruginosa* strain are displayed by distance of displacement ( $\Delta r$ ) of cells. Step size probability density functions (PDF) are shown for movers (solid lines) and resters (dotted lines) in the parallel (lighter lines, ||) and perpendicular (darker lines,  $\perp$ ) directions. Step sizes for each *P. aeruginosa* strain were calculated from cell trajectories with a 1 second (left), 10 second (middle), and 100 second (right) lag time ( $\Delta t$ ). Red stars (movers) and maroon dots (resters) highlight the non-zero sharp-shoulder peak step size, when present.

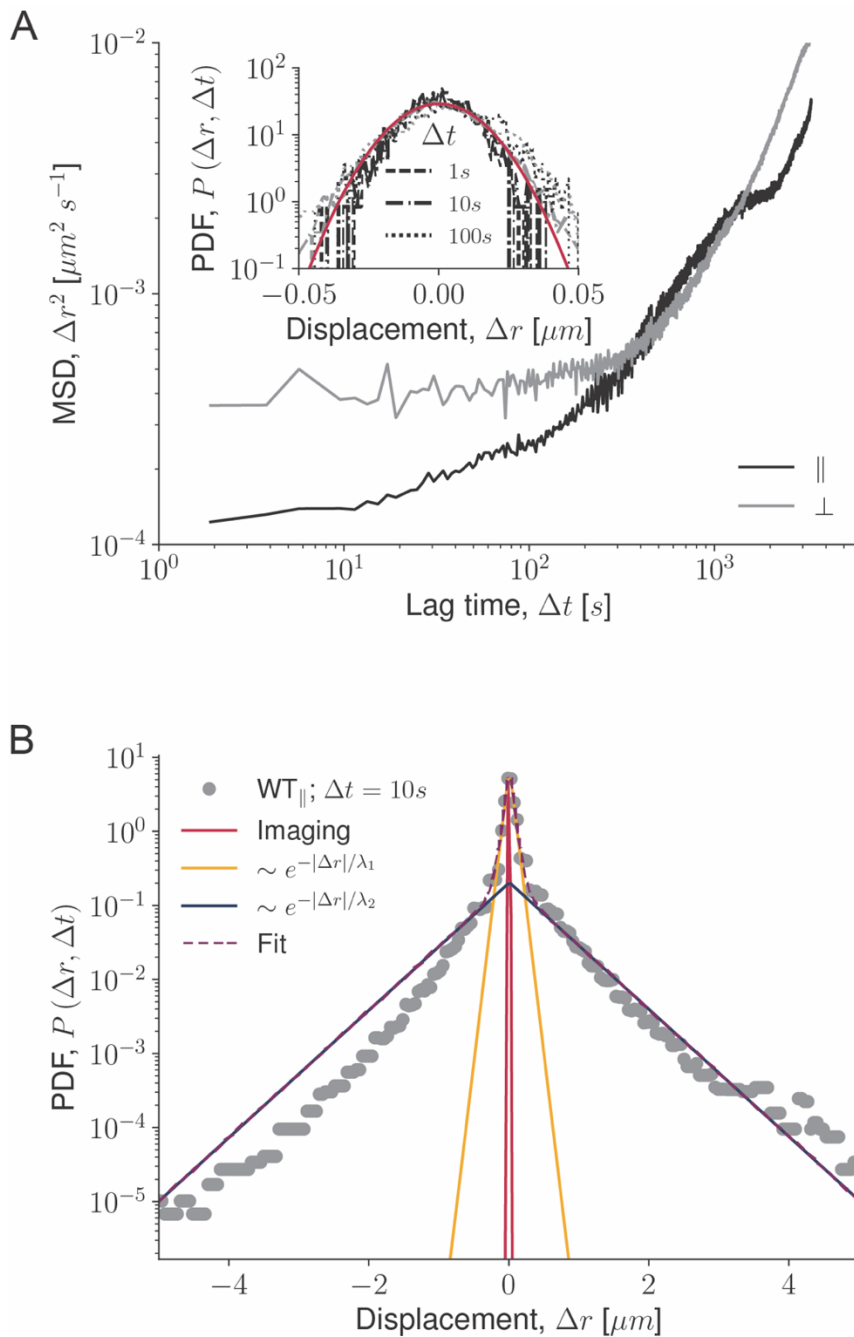

306

307

308

309

310

311

312

313

314

315

316

**Figure 2 – figure supplement 4. Dynamics due to imaging errors.** (A) Mean-squared displacements (MSD) for the parallel ( $\parallel$ ) and perpendicular ( $\perp$ ) directions for dust particles used to measure noise in the imaging. Inset shows the particle-displacement probability density function (PDF). The PDF is a narrow noise peak, that is fit to a Gaussian distribution (solid red line) but is non-diffusive, as it does not broaden in time. (B) PDF of the total cell step displacements ( $\Delta r$ ), regardless of principal direction, for wildtype cells at a lag time of  $\Delta t=10$  seconds. The PDF is composed of a narrow peak of small displacements (jiggling) and long tails of large-but-rare displacements. The narrow peak cannot be explained by imaging uncertainty (solid red curve) and is better described by a Laplace distribution (Eq 7), as are the long tails.



- 317 **Video 1.** *P. aeruginosa* wildtype in monoculture. Duration 3.5 hr. 3 hr post-inoculation. Acquisition interval 1 sec.  
318 Output interval every 40<sup>th</sup> frame at 50ms/frame.  
319
- 320 **Video 2.** *P. aeruginosa* wildtype in coculture. Duration 1 hr 45 min. 3 hr post-inoculation. Acquisition interval 1 sec.  
321 Output interval every 40<sup>th</sup> frame at 50ms/frame.  
322
- 323 **Video 3.** *P. aeruginosa*  $\Delta$ *chpB* in monoculture. Duration 2 hr. 3 hr post-inoculation. Acquisition interval 1 sec. Output  
324 interval every 40<sup>th</sup> frame at 50ms/frame.  
325
- 326 **Video 4.** *P. aeruginosa*  $\Delta$ *chpB* in coculture with *S. aureus* wildtype. Duration 3 hr. 2 hr post-inoculation. Acquisition  
327 interval 1 sec. Output interval every 40<sup>th</sup> frame at 50ms/frame.  
328
- 329 **Video 5.** *P. aeruginosa*  $\Delta$ *pilK* in monoculture. Growing microcolony cells. Duration 3 hr. 3 hr post-inoculation.  
330 Acquisition interval 1 sec. Output interval every 40<sup>th</sup> frame at 50ms/frame.  
331
- 332 **Video 6.** *P. aeruginosa*  $\Delta$ *pilK* in monoculture. Hypermotile cells. Duration 3 hr. 3 hr post-inoculation. Acquisition  
333 interval 1 sec. Output interval every 40<sup>th</sup> frame at 50ms/frame.  
334
- 335 **Video 7.** *P. aeruginosa*  $\Delta$ *pilK* in coculture with *S. aureus* wildtype. Growing microcolony cells. Duration 4 hr. 2 hr  
336 post-inoculation. Acquisition interval 1 sec. Output interval every 40<sup>th</sup> frame at 50ms/frame.  
337
- 338 **Video 8.** *P. aeruginosa*  $\Delta$ *pilK* in coculture with *S. aureus* wildtype. Hypermotile cells. Duration 4 hr. 2 hr post-  
339 inoculation. Acquisition interval 1 sec. Output interval every 40<sup>th</sup> frame at 50ms/frame.  
340
- 341 **Figure 2 – video 1.** *P. aeruginosa*  $\Delta$ *pilJ*  $\Delta$ *flgK* in coculture with *S. aureus* wildtype. Duration 1 hr 15 min. 3 hr post-  
342 inoculation. Acquisition interval 1 sec. Output interval every 40<sup>th</sup> frame at 50ms/frame.  
343
- 344 **Figure 2 – video 2.** *P. aeruginosa*  $\Delta$ *chpB*  $\Delta$ *flgK* in coculture with *S. aureus* wildtype. Duration 3 hr. 3 hr post-  
345 inoculation. Acquisition interval 1 sec. Output interval every 40<sup>th</sup> frame at 50ms/frame.  
346
- 347 **Figure 2 – video 3.** *P. aeruginosa*  $\Delta$ *pilK*  $\Delta$ *flgK* in coculture with *S. aureus* wildtype. Growing microcolony cells.  
348 Duration 2.5 hr. 3 hr post-inoculation. Acquisition interval 2 sec. Output interval every 20<sup>th</sup> frame at 50ms/frame.  
349
- 350 **Figure 2 – video 4.** *P. aeruginosa*  $\Delta$ *pilK*  $\Delta$ *flgK* in coculture with *S. aureus* wildtype. Hypermotile cells. Duration 2.5  
351 hr. 3 hr post-inoculation. Acquisition interval 2 sec. Output interval every 20<sup>th</sup> frame at 50ms/frame.

352 **Results: Methyl modification of PilJ is necessary for TFP-mediated chemotaxis response to *S. aureus***

353 The necessity of PilK and ChpB for directional twitching motility suggests that, like other bacterial chemoreceptors,  
354 methylation levels of PilJ influence the downstream signaling cascade; yet, number and location of the methylation  
355 sites in PilJ are unknown. We hypothesized that PilJ contained at least one methylation site for chemoreceptor  
356 adaptation. To investigate this hypothesis, we first searched the amino acid sequence of PilJ for the conserved ten  
357 amino acid methylation motif. This motif, [A/S/T/G]-[A/S/T/G]-X-X-[E/Q]-[E/Q]-X-X-[A/S/T/G]-[A/S/T/G], has a pair  
358 of glutamine and/or glutamate residues at the center (Alexander & Zhulin, 2007; Ortega et al., 2017; Salah Ud-Din  
359 & Roujeinikova, 2017; Terwilliger et al., 1986). In other MCPs, one of these residues is methylated by the  
360 methyltransferase and demethylated by the methylesterase. Examination of PilJ reveals two motifs with an exact  
361 match to the conserved sequence and one motif that shares nine of the ten conserved amino acids. This suggests  
362 PilJ has three potential methylation sites in the predicted cytoplasmic region (Figure 3A, black and pale orange  
363 circles; Figure 3 – figure supplement 1). The identified methylation sites are located at residues Q412/E413,  
364 Q623/Q624, and Q639/E640.

365  
366 To experimentally determine whether the methylation sites were necessary for TFP-mediated chemotaxis, we next  
367 generated a mutation in each methylation site by substituting the glutamine/glutamate residue pair to an  
368 alanine/alanine pair. Given most other *pilJ* mutants exhibit severely diminished twitching motility, we first compared  
369 the ability of each PilJ methylation site mutant to twitch in a standard subsurface motility assay (Turnbull &  
370 Whitchurch, 2014). Briefly, *P. aeruginosa* was inoculated at the plastic-agar interface and allowed to move prior to  
371 measuring the diameters of motility. Only the *pilJ*<sub>Q412A, E413A</sub> mutant retains full wildtype levels of motility, while  
372 *pilJ*<sub>Q623A, Q624A</sub> has moderate-but-significant reduction in motility and *pilJ*<sub>Q639A, E640A</sub> is severely diminished in twitching  
373 motility (Figure 3B). As the only methylation site mutant that retains wildtype levels of pilus-mediated motility, the  
374 next question is whether *pilJ*<sub>Q412A, E413A</sub> exhibits reduced attraction towards *S. aureus*. In the macroscopic directional  
375 motility assay, *pilJ*<sub>Q412A, E413A</sub> demonstrates significant loss of migration up the gradient of *S. aureus* supernatant  
376 (Figure 3C). The other methylation site mutants also display attenuated chemoattraction to *S. aureus*; yet, it is  
377 unclear how much of this reduced response is due to motility defects versus deficiency in pilus-mediated chemotaxis  
378 (Figure 3 – figure supplement 2). To confirm that the migration phenotype of *pilJ*<sub>Q412A, E413A</sub> can be restored with full-  
379 length *pilJ*, the mutant and wildtype strains were complemented with a plasmid containing a GFP-tagged copy of  
380 wildtype *pilJ* under control of an arabinose-inducible promoter (Figure 3 – figure supplement 3). This allows for  
381 visualization of PilJ in the cells, which show the expected bipolar localization (Figure 3 – figure supplement 3A).  
382 Additionally, the complemented mutant strain shows levels of directional response similar to wildtype harboring the  
383 complementation plasmid (Figure 3 – figure supplement 3B). Due to the GFP tag, some PilJ signaling may be  
384 diminished leading to the lower interspecies signal response in the complemented strains.

385  
386 Next, we live-imaged the *pilJ*<sub>Q412A, E413A</sub> mutant in monoculture and observe that it moves earlier than wildtype,  $\Delta pilK$ ,  
387 or  $\Delta chpB$ , with single-cell or small groups of two to three cells traveling together (Video 9). Furthermore, *pilJ*<sub>Q412A,</sub>  
388 <sub>E413A</sub> does not form a microcolony; rather, the cells begin to twitch and move apart from each other at very low cell  
389 density, typically before there are ~10 cells present. This behavior is recapitulated in the presence of *S. aureus*,  
390 with *pilJ*<sub>Q412A, E413A</sub> additionally showing no bias in movement towards *S. aureus* (Figure 3D, Video 10). The *pilJ*<sub>Q412A,</sub>

391 *E413A* mutant cells do become elongated after a few hours compared to wildtype. This slight cell division defect is  
392 likely due to the high cAMP levels in *pilJ*<sub>Q412A, E413A</sub> (see Figure 5). Live-imaging of a *pilJ*<sub>Q412A, E413A</sub>  $\Delta$ *flgK* mutant in  
393 coculture with *S. aureus* phenocopies the parental *pilJ*<sub>Q412A, E413A</sub> (Figure 3 – video 1). Together these data identify  
394 the methylation sites of PilJ and show that methyl modification of these sites is important for chemotaxis signaling.

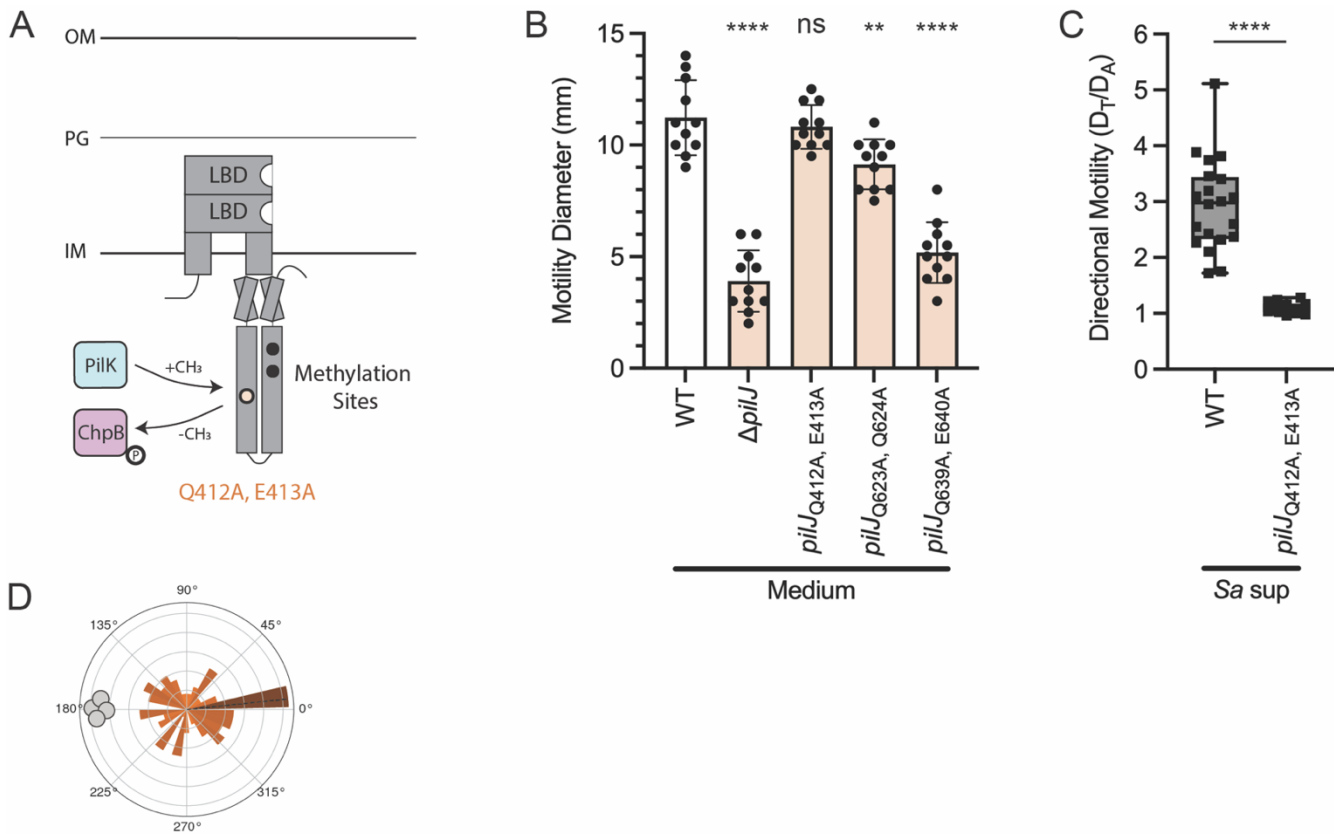

395

396

397

398

399

400

401

402

403

404

405

406

407

408

409

**Figure 3. Methyl modification of PilJ is necessary for TFP-mediated chemotaxis response to *S. aureus*.** (A) Schematic of PilJ with cytoplasmic methylation sites represented as black circles. The methylation site Q412, E413, whose mutant retains wildtype motility and is further studied for chemotaxis response, is highlighted in pale orange. (B) Twitching motility diameters of *P. aeruginosa* wildtype and methylation mutants. Motility diameters were analyzed by a one-way ANOVA followed by Dunnett's multiple comparisons test. \*\*\*\* indicates p < 0.0001; \*\* indicates p < 0.01; ns indicates no statistically significant difference. (C) Migration towards *S. aureus* secreted factors of *P. aeruginosa* wildtype and methylation mutant pilJ<sub>Q412A, E413A</sub>. Directional motility measurements were analyzed with an unpaired t-test. \*\*\*\* indicates p < 0.0001. Motility diameters and directional motility are shown for at least three biological replicates each containing a minimum of four technical replicates. (D) Rose graph of the principal angle of motility for each cell trajectory relative to starting position for *P. aeruginosa* pilJ<sub>Q412A, E413A</sub> in coculture with *S. aureus*. Position of *S. aureus* relative to the center of the pilJ<sub>Q412A, E413A</sub> cells is represented by the gray cocci on the perimeter. Trajectory angles are shown by colored vectors with the average angle of all trajectories represented by the dotted black line. Larger vectors indicate more cells for the given principal angle. One rose graph representative of at least three replicates is shown.

> **PilJ (PA14\_05360)**

MKKINAGNLFAGMRSSSVIAGLFIIVLIVSIVLLFANFAYLNTQSNHDKQYIGHAGELRVLSQRIAKNATEAAA  
 GKGEAFKLLKДАРNDFEKRWNILVNGDESTSLPPSPEAVKPKQMDVVQODWDGLRKNADSIASEQTVLSLHQV  
 ASTLAETIPQLQVEYEEVVDILLENGAPADQVAVAQROSLLAERILGSVNKVLGDNESVQAADSFGRDASLF  
 GRVLKGMQEGNAAMSISKVTNAEAVDRLEIAELFEFVSGSVDEILETSPDLFQVREAANNIFSVSQTLLDKA  
 SQLADGFENLAGGRSINLFAGYVVLGALALASIIILIGLVMVRETNRRLAETAEKNDRNQAAILRLLDEIADLAD  
 GDLTVAATVTEDFTGAIADSYNSIDQLRELVTINQTAVOV**AAAAQ**ET**OST**TAMHLAEASEHQAEIAGASAA  
 INEMAVSIDQVSANASESSAVAERSVAIANKGNEVVHNTITGMDNIREQIQDTSKRIKRLGESSQEIGDIVSL  
 INDIADQTNILALNAAIQASMAGDAGRFAVVADEVQRLAERSSAATKQIEALVKTIQDTDNEAVISMEQTT  
 EVVRGARLAQDAGVALEEIEKVSKTALAALIQNIS**SNAAR**QQ**ASSAGHISNTMNVI**QE**ITSQ**TSAGTTATARSIG  
 NLAKMASEMRNSVSGFKLPEGVEQA

410

411 **Figure 3 – Figure supplement 1. Methylation sites of PilJ.** Amino acid sequence of *P. aeruginosa* PA14 PilJ

412 (PA14\_05360) with conserved MCP methylation motifs highlighted in pale orange and predicted methyl modification

413 glutamate/glutamine residue pairs in bold.

414

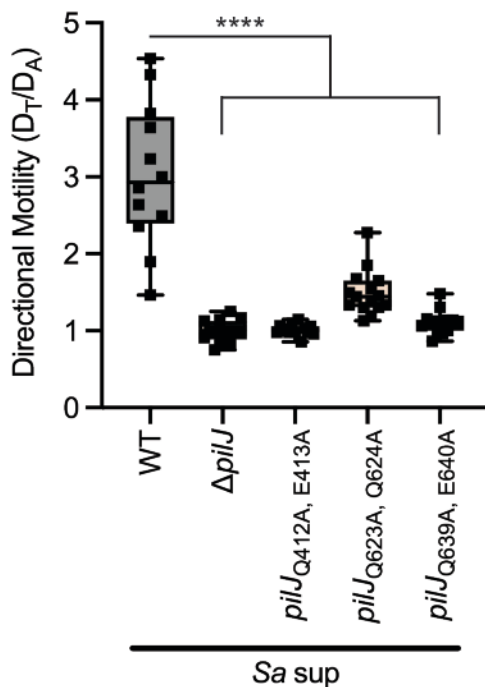

415

416 **Figure 3 – Figure supplement 2. Mutation of any cytoplasmic PilJ methylation site reduces *P. aeruginosa***

417 **attraction to interspecies signals.** Directional motility of *P. aeruginosa* wildtype and methylation mutants *pilJ*<sub>Q412A,</sub>

418 *E413A*, *pilJ*<sub>Q623A, Q624A</sub>, and *pilJ*<sub>Q639A, E640A</sub> in the presence of a gradient of *S. aureus* supernatant. Directional motility for

419 at least four biological replicates, each containing a minimum of three technical replicates are shown and statistical

420 significance was determined with a one-way ANOVA followed by Dunnett's multiple comparisons test. \*\*\*\* indicates

421  $p < 0.0001$ .

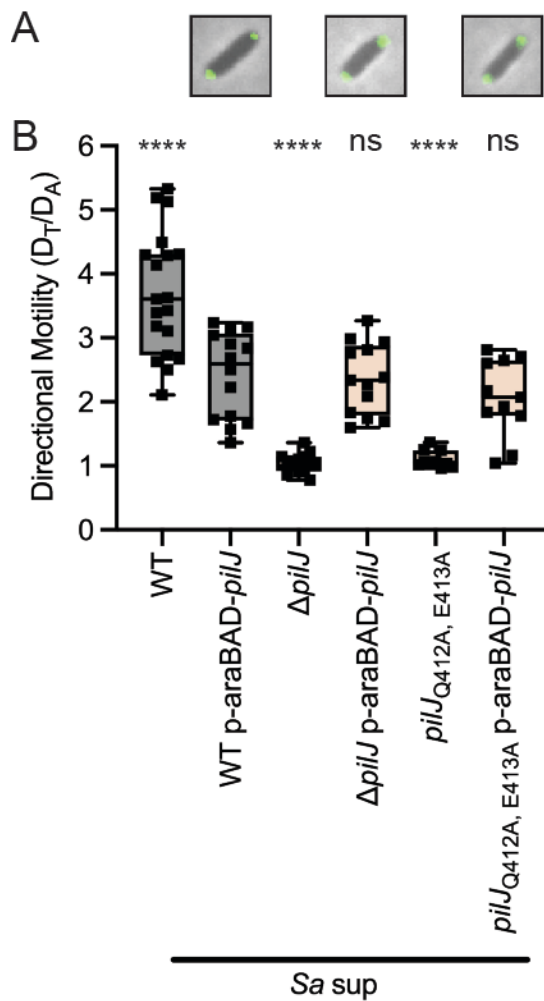

422

423

424

425

426

427

428

429

430

431

432

433

434

435

436

437

438

439

**Figure 3 – Figure supplement 3. Complemented *pilJ*<sub>Q412A, E413A</sub> with full-length PilJ displays bipolar PilJ localization and restoration of TFP-mediated directional motility.** (A) Representative *P. aeruginosa* cells with bipolarly localized GFP-tagged PilJ. (B) Directional motility towards *S. aureus* secreted factors of wildtype or *pilJ*<sub>Q412A, E413A</sub> with and without complementing plasmids carrying arabinose-inducible copy of wildtype *pilJ*. Complemented strains were induced with 0.2% arabinose; however, phenotypes were the same in the absence of induction. Directional motility for at least three biological replicates, each containing a minimum of three technical replicates are shown and statistical significance was determined with a one-way ANOVA followed by Dunnett's multiple comparisons test to compare each strain to wildtype *P. aeruginosa* carrying p-araBAD-*pilJ*. \*\*\*\* indicates  $p < 0.0001$ ; ns indicates no statistically significant difference.

**Video 9.** *P. aeruginosa pilJ*<sub>Q412A, E413A</sub> in monoculture. Duration 2 hr 40 min. 2 hr 20 min post-inoculation. Acquisition interval 1 sec. Output interval every 40<sup>th</sup> frame at 50ms/frame.

**Video 10.** *P. aeruginosa pilJ*<sub>Q412A, E413A</sub> in coculture with *S. aureus* wildtype. Duration 3 hr. 2 hr post-inoculation. Acquisition interval 1 sec. Output interval every 40<sup>th</sup> frame at 50ms/frame.

440 **Figure 3 – video 1.** *P. aeruginosa pilJ<sub>Q412A, E413A</sub> ΔflgK* in coculture with *S. aureus* wildtype. Duration 3.5 hr. 1 hr  
441 post-inoculation. Acquisition interval 1 sec. Output interval every 40<sup>th</sup> frame at 50ms/frame.  
442



443 **Results: The ligand binding domains of PilJ are required for pilus-mediated chemotaxis but not twitching**  
444 **motility**

445 Given methylation adaptation is necessary to bias movement towards *S. aureus* but not twitching, we next asked if  
446 the LBDs of *P. aeruginosa* PilJ are also required for directing motility. We generated a mutant lacking the periplasmic  
447 portion containing both predicted PilJ LBDs (residues 39-303), based on the predictions by Martín-Mora et al. and  
448 confirmed by AlphaFold, yet kept the transmembrane domains and entire cytoplasmic region intact, which we now  
449 refer to as *pilJ*<sub>ΔLBD1-2</sub> (Figure 4A, LBDs in pale orange) (Martin-Mora et al., 2019).

450  
451 We first tested whether *pilJ*<sub>ΔLBD1-2</sub> retained any twitching motility using the subsurface twitching assay, as described  
452 above, and found that loss of the LBDs does not reduce the ability to twitch (Figure 4B). Since *pilJ*<sub>ΔLBD1-2</sub> is able to  
453 twitch to wildtype levels, we next tested the extent that it could chemotax up a gradient of *S. aureus* secreted factors.  
454 Despite being able to twitch, *pilJ*<sub>ΔLBD1-2</sub> loses nearly all ability to move directionally towards *S. aureus* secreted  
455 factors (Figure 4C). When complemented with the same *pilJ-gfp* plasmid described above, *pilJ*<sub>ΔLBD1-2</sub> exhibits bipolar  
456 localization of PilJ; however, only partial restoration of interspecies signal response is observed, despite statistical  
457 similarity to wildtype with the complement plasmid (Figure 4 – figure supplement 1). Chemoreceptors are typically  
458 grouped in arrays of trimer-of-dimer units with each unit signaling downstream to a kinase (Parkinson et al., 2015).  
459 Therefore, despite proper localization, the combination of mutant and GFP-tagged wildtype copies of PilJ for this  
460 particular strain may lead to trimers-of-dimers with inefficient signaling for complete directional response (i.e., the  
461 *pilJ*<sub>ΔLBD1-2</sub> allele is partially dominant).

462  
463 Following examination of community level movement and response, we performed live-imaging of *pilJ*<sub>ΔLBD1-2</sub> in  
464 monoculture to determine how loss of the LBDs impacted single-cell movements. The *pilJ*<sub>ΔLBD1-2</sub> mutant displays  
465 increased and earlier motility, with cells lacking microcolony formation seen by the wildtype (Video 11). Unlike the  
466 methylation PilJ mutant, *pilJ*<sub>ΔLBD1-2</sub> tends to move as groups of cells, with trajectories curving in wide loops (Video  
467 11). These behaviors are echoed in coculture with *S. aureus*, with *P. aeruginosa pilJ*<sub>ΔLBD1-2</sub> appearing to show no  
468 bias towards *S. aureus* microcolonies (Figure 4D, Video 12). This behavior is also phenocopied by a *pilJ*<sub>ΔLBD1-2</sub> Δ*flgK*  
469 mutant (Figure 4 – video 1). Collectively, these data establish a role for the LBDs of PilJ in control of response to  
470 interspecies signals, while also showing they are not essential for general pilus-mediated motility.

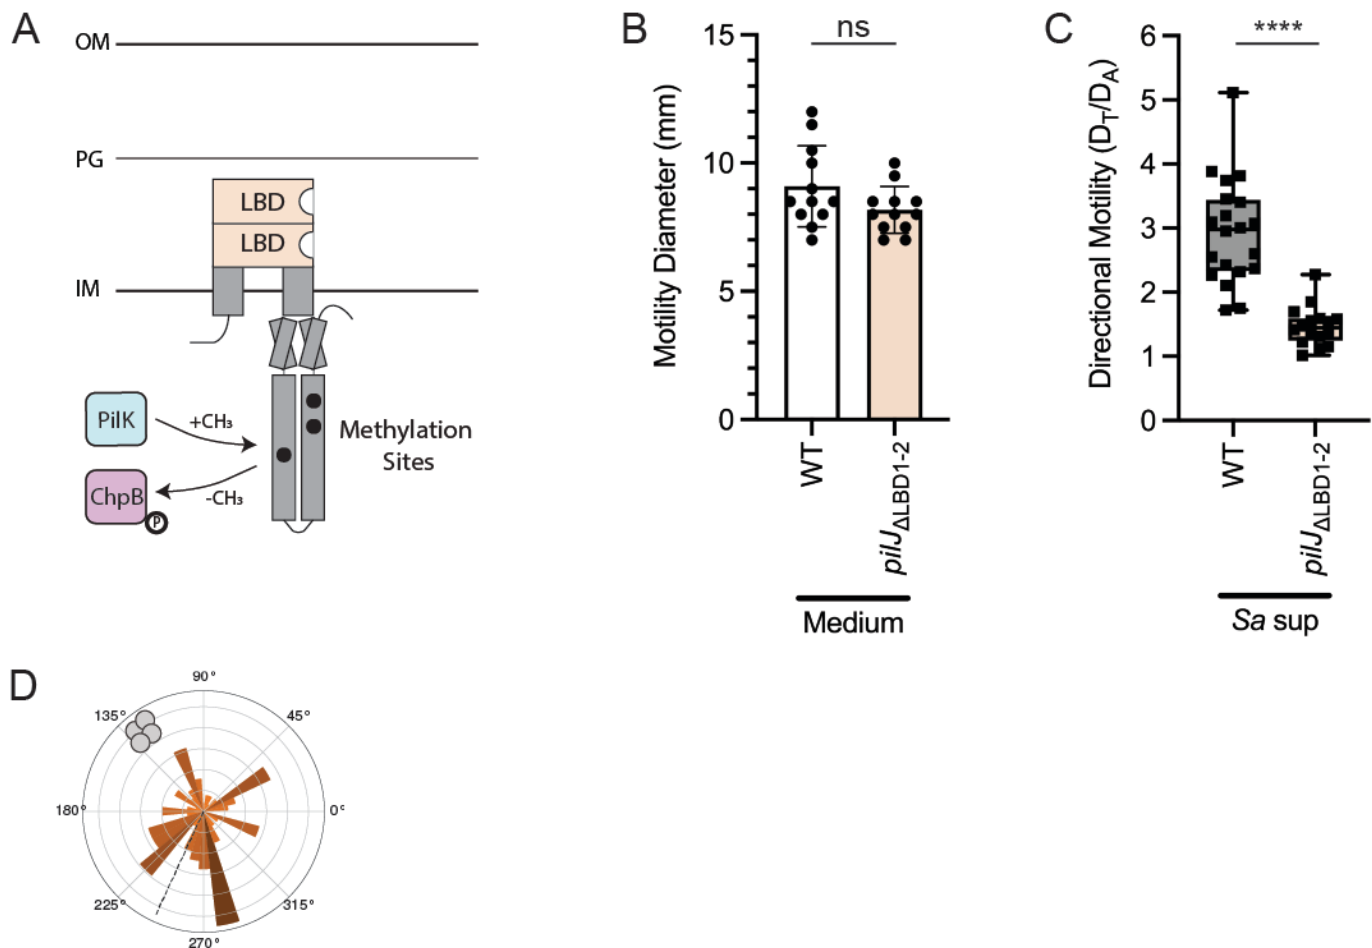

471

472 **Figure 4. The ligand binding domains of PilJ are required for pilus-mediated chemotaxis but not twitching**

473 **motility.** (A) Schematic of PilJ with periplasmic ligand binding domains (LBDs) highlighted in pale orange. Twitching

474 motility diameters (B) and directional motility towards *S. aureus* secreted factors (C) of *P. aeruginosa* wildtype and

475 *pilJ*<sub>ΔLBD1-2</sub>. Macroscopic motility measurements were analyzed with an unpaired t-test. \*\*\*\* indicates  $p < 0.0001$ ; ns

476 indicates no statistically significant difference. Motility diameters and directional motility are shown for at least three

477 biological replicates each containing a minimum of three technical replicates. (D) Rose graph of the principal angle

478 of motility for each cell trajectory relative to starting position for *P. aeruginosa pilJ*<sub>ΔLBD1-2</sub> in coculture with *S. aureus*.

479 Position of *S. aureus* relative to the center of the *pilJ*<sub>Q412A, E413A</sub> cells is represented by the gray cocci on the

480 perimeter. Trajectory angles are shown by colored vectors with the average angle of all trajectories represented by the

481 dotted black line. Larger vectors indicate more cells for the given principal angle. One rose graph representative

482 of at least three replicates is shown.

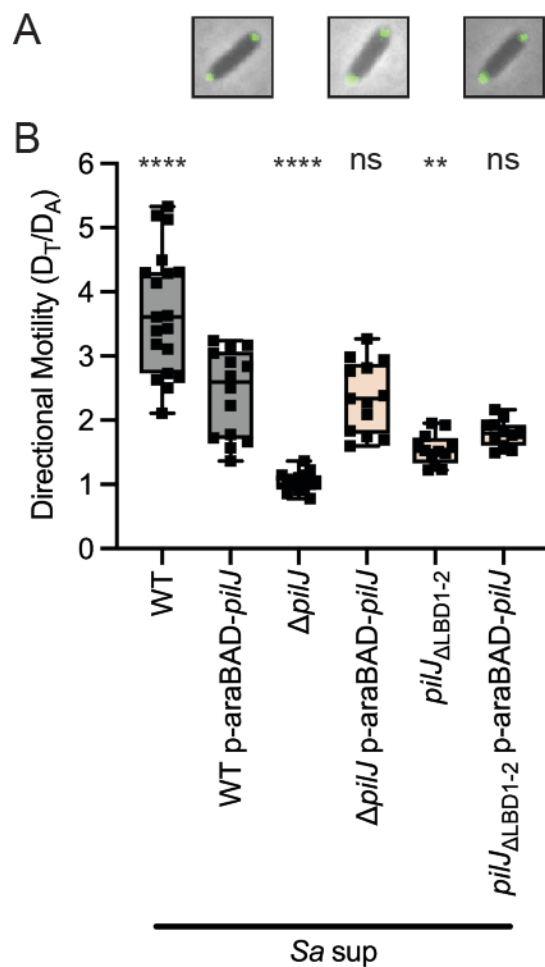

483

484

485

486

487

488

489

490

491

492

**Figure 4 – Figure supplement 1. Complemented *pilJ*<sub>ΔLBD1-2</sub> has bipolarly localized PilJ but only partial restoration of TFP-mediated chemotaxis.** (A) Representative *P. aeruginosa* cells with bipolarly localized GFP-tagged PilJ. (B) Directional motility towards *S. aureus* secreted factors of wildtype or *pilJ*<sub>ΔLBD1-2</sub> with and without complementing plasmid carrying arabinose-inducible copy of wildtype *pilJ*. Complemented strains were induced with 0.2% arabinose; however, phenotypes were the same in the absence of induction. Directional motility for at least three biological replicates, each containing a minimum of three technical replicates are shown and statistical significance was determined with a one-way ANOVA followed by Dunnett's multiple comparisons test to compare each strain to wildtype *P. aeruginosa* carrying p-araBAD-*pilJ*. \*\*\*\* indicates p<0.0001; \*\* indicates p<0.01; ns indicates no statistically significant difference.

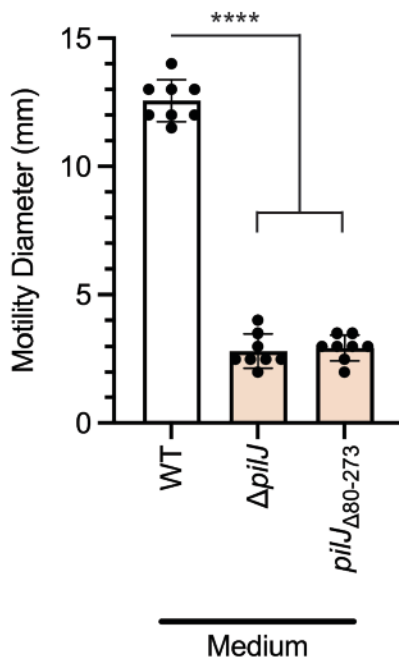

493

494

**Figure 4 – figure supplement 2. PilJ mutant lacking a portion of the periplasmic region is non-motile.**

495

Twitching motility diameters of *P. aeruginosa* wildtype,  $\Delta pilJ$ , and a *pilJ* mutant lacking amino acids 80-273 (*pilJ*<sub>Δ80-</sub>

496

273). Macroscopic motility measurements are shown for two biological replicates, each containing four technical

497

replicates and statistical significance was determined with a one-way ANOVA followed by Dunnett's multiple

498

comparisons test. \*\*\*\* indicates  $p < 0.0001$ .

499

500

501

**Video 11.** *P. aeruginosa pilJ*<sub>ΔLBD1-2</sub> in monoculture. Duration 2 hr 40 min. 2 hr 20 min post-inoculation. Acquisition

502

interval 1 sec. Output interval every 40<sup>th</sup> frame at 50ms/frame.

503

504

**Video 12.** *P. aeruginosa pilJ*<sub>ΔLBD1-2</sub> in coculture with *S. aureus* wildtype. Duration 2 hr. 3 hr post-inoculation.

505

Acquisition interval 1 sec. Output interval every 40<sup>th</sup> frame at 50ms/frame.

506

507

**Figure 4 – video 1.** *P. aeruginosa pilJ*<sub>ΔLBD1-2</sub>  $\Delta flgK$  in coculture with *S. aureus* wildtype. Duration 3 hr. 2 hr post-

508

inoculation. Acquisition interval 1 sec. Output interval every 40<sup>th</sup> frame at 50ms/frame.

509 **Results: cAMP changes during pilus-mediated chemotaxis independent of TFP activity**

510 Intracellular levels of the second messenger cAMP and Pil-Chp activity are connected. As signal transduction  
511 through Pil-Chp increases, the response regulator PilG directly activates the adenylate cyclase, CyaB, necessary  
512 for cAMP synthesis (Fulcher et al., 2010). In turn, cAMP indirectly increases transcriptional expression of *pil-chp*  
513 generating a positive feedback loop between the two systems (Fulcher et al., 2010; Wolfgang et al., 2003).

514  
515 Due to the role of Pil-Chp in perception and reaction to *S. aureus*, we asked whether *P. aeruginosa* increased cAMP  
516 levels during interactions with *S. aureus*. To answer this question, we live-imaged a previously established cAMP  
517 reporter strain *P. aeruginosa* wildtype PAO1 carrying a cAMP-responsive promoter,  $P_{xphA}$ , fused to *yfp* and a  
518 constitutively expressed promoter  $P_{rpoD}$ , fused to *mKate2* (Persat et al., 2015). Kinetic cAMP levels were measured  
519 in individual cells in monoculture or coculture with *S. aureus*, with YFP normalized to mKate2 fluorescence. cAMP  
520 is known to be heterogenous amongst cells in a population. In wildtype *P. aeruginosa* monoculture, this  
521 heterogeneity is observed, but with minor changes in cAMP levels over time. However, in coculture, cAMP  
522 increases, particularly in cells that move towards and surround *S. aureus* (Figure 5A-D). This suggests that  
523 response to *S. aureus* is associated with increases in cAMP. Furthermore, when community level response of *P.*  
524 *aeruginosa* lacking either CyaB or the cAMP phosphodiesterase, CpdA, was examined, *P. aeruginosa* cannot fully  
525 move up a gradient of *S. aureus* supernatant, despite retaining twitching motility (Figure 5 – figure supplement 1).  
526 These data suggest that *P. aeruginosa* controls cAMP levels for proper TFP-mediated response to interspecies  
527 signals.

528  
529 Next, we asked how cAMP levels compared between response-deficient mutants and the parental *P. aeruginosa*  
530 (PA14). While reporter levels in PA14 are lower in comparison to PAO1, a similar trend is observed. Each mutant  
531 shows at least some increase in cAMP relative to wildtype cAMP levels in monoculture or coculture, though not  
532 significant for  $\Delta pilK$  and  $\Delta chpB$ . The  $pilJ_{\Delta LBD1-2}$  mutant exhibits an approximately two-fold increase in cAMP over  
533 time compared to wildtype; whereas,  $pilJ_{\Delta Q412A, E413A}$  exhibits a ten-fold increase, independent of the presence of *S.*  
534 *aureus* (Figure 5E, F). These data suggest that cAMP levels are determined by chemoreceptor-mediated signaling,  
535 although the degree to which cAMP increases does not always directly correlate with the extent of increased motility.

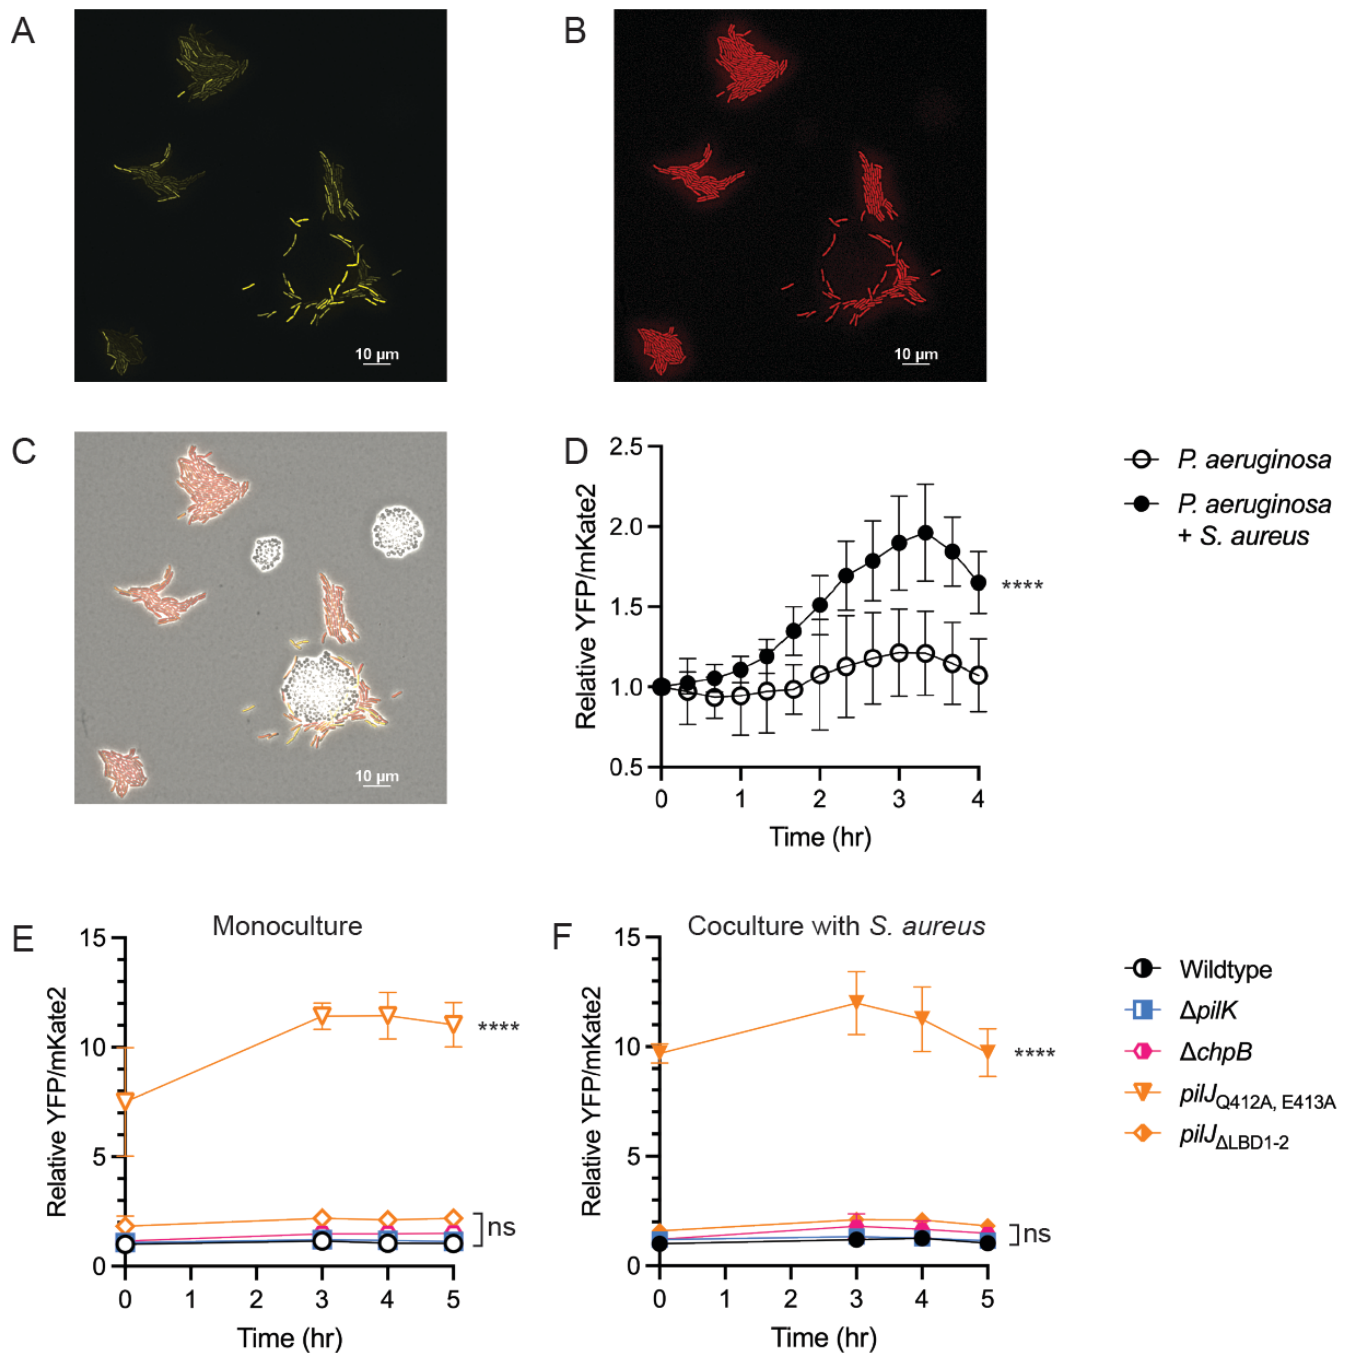

536

537 **Figure 5. cAMP changes during pilus-mediated chemotaxis independent of TFP activity.** (A-D) Intracellular  
 538 levels of *P. aeruginosa* cAMP measured in monoculture and coculture with *S. aureus* using a *P. aeruginosa* PAO1  
 539 strain carrying a reporter with the cAMP-responsive promoter *PxphA* transcriptionally fused to *yfp* and constitutively  
 540 expressed promoter *PrpoD* fused to *mKate2* for normalization. Representative coculture images at t = 3.5 hr for the  
 541 YFP (A) TxRed (B), and merged channels (C). cAMP levels of *P. aeruginosa* PA14 *pil-chp* mutants in monoculture  
 542 (E) and coculture with *S. aureus* (F) using the cAMP reporter. cAMP levels were monitored by dividing YFP by  
 543 mKate2 fluorescence intensity for each time point and normalizing intensity to wildtype cAMP at t = 0 hr. cAMP  
 544 levels are shown for at least four microcolonies per condition and were compared using either multiple unpaired t-  
 545 tests or a one-way ANOVA followed by Dunnett's multiple comparison's test. \*\*\*\* indicates p<0.0001; ns indicates  
 546 no statistically significant difference.

547

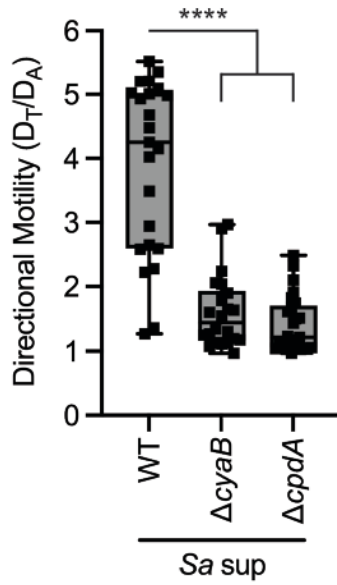

548

549

550

551

552

**Figure 5 – figure supplement 1. Enzymes that control cAMP levels are necessary for pilus-mediated chemotaxis.** Directional motility towards *S. aureus* secreted factors of  $\Delta cyaB$  and  $\Delta cpdA$ . At least three biological replicates, each containing a minimum of three technical replicates are shown and statistical significance was determined with a one-way ANOVA followed by Dunnett's multiple comparisons test. \*\*\*\* indicates  $p < 0.0001$ .





568 **Discussion**

569 While the Pil-Chp system has been studied for its roles in twitching motility and cAMP regulation, less work has  
570 explored the additional roles of the system in TFP-mediated chemotaxis. Furthermore, most studies have primarily  
571 investigated PilJ through a non-motile complete-deletion mutant, which allowed little understanding of the domains  
572 of PilJ that determine chemoreceptor activity. Here, we utilized domain-specific mutations of PilJ to evaluate single-  
573 cell and community level behaviors that define the importance of PilJ to sense and relay interspecies signals to  
574 pilus response regulators. These observations show *P. aeruginosa* is able to move towards interspecies signals  
575 through a novel TFP-mediated chemotaxis mechanism and that PilJ does have the necessary components to serve  
576 as a MCP for signal sensation, transmission, and adaptation (Figure 6). To our knowledge, this is the first study to  
577 generate mutants in the LBDs and methylation sites of PilJ to define their contribution to chemotactic regulation.

578  
579 While flagella-mediated chemotaxis of swimming bacteria has been extensively characterized, there is  
580 comparatively little insight into bacterial chemotaxis on a surface. Despite overall sequence similarity of PilJ in the  
581 cytoplasmic region to other *P. aeruginosa* MCPs, the low similarity of the periplasmic region containing the LBDs  
582 has led to several questions about the function of this putative pilus MCP. First, what ligands does PilJ bind? Martín-  
583 Mora et al. previously investigated the only other *P. aeruginosa* MCP containing a PilJ LBD, McpN, which was  
584 shown to bind nitrate (Martin-Mora et al., 2019). Evaluation of the McpN and PilJ ligand binding pocket motifs  
585 showed little conservation between the two MCPs and PilJ lacked nitrate binding ability (Martin-Mora et al., 2019).  
586 If PilJ does not bind nitrate, then what signals can it bind? Persat et al. showed that PilJ can interact with the pilus  
587 monomer PilA in the periplasmic regions of each protein and proposed this interaction regulates mechanosensing  
588 (Persat et al., 2015), although recent data argues against this model (Kuchma & O'Toole, 2022). *P. aeruginosa* has  
589 a second non-conventional chemosensory system for surface sensing, called Wsp. Recently, it was shown that the  
590 Wsp system is more broadly a membrane stress detection system and surfaces are just one of many membrane  
591 stressors that the receptor WspA detects (O'Neal et al., 2022). In eukaryotic cells, phenol soluble modulins (PSMs)  
592 are known to form a membrane-perturbing pore; thus, PilJ may also perceive and transduce interspecies peptide-  
593 induced membrane stress (Figure 6) (Verdon et al., 2009).

594  
595 If PilJ binds a conventional chemoattractant signal, full length PSMs are unlikely to interact directly with the LBD,  
596 due to their size and amphipathic secondary structure. Nolan et al. identified that *P. aeruginosa* exhibits increased  
597 twitching in the presence of environmental signals, such as tryptone, mucins, or bovine serum albumin (Nolan et  
598 al., 2020). This response required *P. aeruginosa* protease activity, presumably to cleave environmental factors into  
599 smaller signals (Nolan et al., 2020). While this group did not study the chemotactic nature of these compounds,  
600 they do suggest that the increased twitching response is PilJ-mediated. This indicates that PilJ may sense a broad  
601 range of environmental signals. It is thus plausible that the *S. aureus* peptides, which are shown to elicit a PilJ-  
602 dependent chemotaxis response here, are indeed a chemoattractant signal. Yet, it is still unclear how PSMs may  
603 gain access to and bind the periplasmic LBDs of PilJ and thus act as a traditional chemoattractant signal for  
604 activation of downstream signaling. Therefore, protease-cleavage of interspecies peptides may be necessary to  
605 fragment PSMs into signal-sized peptides for either direct or indirect PilJ binding, in conjunction with earlier  
606 observations that *P. aeruginosa* chemotaxes towards di- or tripeptides rather than larger oligopeptides (Kelly-

607 Wintenberg & Montie, 1994). Another possibility is that the peptides bind PilJ indirectly, perhaps through a solute  
608 binding protein, as previously reported for chemoattractant inorganic indirectly binding chemoreceptor CtpL through  
609 the mediating solute binding protein PtsS (Matilla et al., 2021; Rico-Jiménez et al., 2013). Investigation of these  
610 hypotheses, including a role for membrane stress, is currently underway (Figure 6).

611  
612 Jansari et al. previously reported that their *pilJ* mutant retained some twitching motility, but had diminished response  
613 to phosphatidylethanolamine (Jansari et al., 2016). In our current study, chemoattraction to  
614 phosphatidylethanolamine by wildtype *P. aeruginosa* was not observed and therefore chemotaxis towards  
615 phosphatidylethanolamine by the *pilJ* mutants generated here could not be determined. Jansari et al. generated a  
616 *pilJ* mutant lacking residues 74-273 (Jansari et al., 2016). Examination of a similar mutant lacking residues 80-273  
617 in the present investigation shows that *P. aeruginosa pilJ<sub>Δ80-273</sub>* similarly has reduced twitching; yet, this defect  
618 unfortunately yields insufficient motility to measure reduced attraction to *S. aureus* and, thus, could not be evaluated  
619 here (Figure 4 – figure supplement 2). However, the mutant lacking both PilJ domains (residues 39-303; *pilJ<sub>ΔLBD1-2</sub>*)  
620 retains near wildtype levels of motility and allows for visualization of response deficiency at both the community and  
621 single-cell levels. These observations show that without the PilJ LBDs, *P. aeruginosa* is unable to bias motility  
622 towards interspecies signals, which further supports that the periplasmic portion of PilJ is not essential for twitching  
623 motility but is important for sensing signals—whether they are chemoattractants or surface signals. This suggests  
624 PilJ has evolved to coordinate TFP motility in response to several environmental factors. It remains unknown,  
625 however, why *P. aeruginosa* PilJ contains two *pilJ* LBDs and whether they bind ligands cooperatively or  
626 independently, or if each has a designated role for particular chemo- or surface-sensing signals.

627  
628 Little was previously known about the methylation sites on PilJ, which are typically required for chemotaxis  
629 adaptation. While bacterial chemoreceptors have a conserved motif for methylation sites, potential motifs on PilJ  
630 had not been identified. This work is the first to identify three likely residue pairs for methyl modification on PilJ,  
631 further characterizing the chemoreceptor. In other bacterial chemoreceptors, mutation of each methylation site on  
632 a chemoreceptor does not lead to the same phenotype (Astling et al., 2006). Thus, it is reasonable that mutations  
633 in each PilJ methylation site differentially influence the conformation of PilJ signaling domains and lead to the three  
634 different macroscopic motility behaviors described here (Figure 3B; Figure 3 – figure supplement 2). While live-  
635 imaging was only performed on the first methylation site, this was sufficient to show changes in these sites can  
636 dramatically alter *P. aeruginosa* chemotaxis (Video 9).

637  
638 Increases in *P. aeruginosa* cAMP are commonly associated with surface sensing and Pil-Chp activity. It is further  
639 established that while PilG activates CyaB for cAMP production, cAMP in turn increases expression of *pil-chp* genes  
640 (Fulcher et al., 2010; Wolfgang et al., 2003). However, previous reports focused on Pil-Chp activity in terms of  
641 twitching motility; thus, a link between chemotactic Pil-Chp activity and cAMP levels had been ambiguous. While  
642 each mutant shown here has varying levels of motility, all are increased in both motility and cAMP levels relative to  
643 wildtype; yet, there is not a direct correlation between mutants that have increased motility and the degree to which  
644 cAMP is increased. Only *pilJ<sub>Q412A, E413A</sub>* showed much higher levels of cAMP at nearly 10-fold the amount as wildtype.

645 While the precise role of cAMP signaling in chemotaxis is unclear, studies are currently underway to further  
646 interrogate this signaling pathway.

647

648 Dissection of Pil-Chp and its role in chemotaxis towards interspecies signals has broadened understanding of a  
649 unique bacterial chemosensory system that may be utilized for bacterial communication and survival in complex,  
650 polymicrobial environments. During *P. aeruginosa*-*S. aureus* coinfections, such as those in cystic fibrosis airways,  
651 patients often succumb to worse clinical outcomes than their counterparts who are only infected by one organism  
652 (Limoli & Hoffman, 2019). Furthermore, once coinfecting, patients tend to stay infected by both organisms for several  
653 years (Fischer et al., 2021). Such stable, long-term polymicrobial infections may be enhanced by the chemical and  
654 physical interactions between species seen here. With this knowledge of how bacteria can sense their respective  
655 secreted factors, new therapeutic strategies targeting this system may provide the opportunity to break  
656 communication between species and prevent these detrimental interactions thereby eliminating infections and  
657 consequently improve patient outcomes.

658

## Key Resources Table

| Reagent type (species) or resource                          | Designation                 | Source or reference | Identifiers                         | Additional Information    |
|-------------------------------------------------------------|-----------------------------|---------------------|-------------------------------------|---------------------------|
| Strain, strain background ( <i>Pseudomonas aeruginosa</i> ) | PA14 wildtype (WT)          | PMID: 7604262       | SMC232 (O'Toole Strain Collection)  |                           |
| Strain, strain background ( <i>Pseudomonas aeruginosa</i> ) | PA14 $\Delta pilA$          | PMID: 20233936      | SMC3782 (O'Toole Strain Collection) |                           |
| Strain, strain background ( <i>Pseudomonas aeruginosa</i> ) | PA14 $\Delta pilJ$          | PMID: 18178737      | SMC2992 (O'Toole Strain Collection) |                           |
| Strain, strain background ( <i>Pseudomonas aeruginosa</i> ) | PA14 $pilJ_{\Delta LBD1-2}$ | This study          | PADHL496                            | See Methods and Materials |
| Strain, strain background ( <i>Pseudomonas aeruginosa</i> ) | PA14 $pilJ_{\Delta 80-273}$ | This study          | PADHL497                            | See Methods and Materials |
| Strain, strain background ( <i>Pseudomonas aeruginosa</i> ) | PA14 $pilJ_{Q412A, E413A}$  | This study          | PADHL498                            | See Methods and Materials |
| Strain, strain background ( <i>Pseudomonas aeruginosa</i> ) | PA14 $pilJ_{Q623A, Q624A}$  | This study          | PADHL559                            | See Methods and Materials |
| Strain, strain background ( <i>Pseudomonas aeruginosa</i> ) | PA14 $pilJ_{Q639A, E640A}$  | This study          | PADHL560                            | See Methods and Materials |
| Strain, strain background ( <i>Pseudomonas aeruginosa</i> ) | PA14 $\Delta pilK$          |                     | SMC8426 (O'Toole Strain Collection) |                           |
| Strain, strain background ( <i>Pseudomonas aeruginosa</i> ) | PA14 $chpA::Tn$             |                     | PA14 Ordered Transposon Library     |                           |
| Strain, strain background ( <i>Pseudomonas aeruginosa</i> ) | PA14 $\Delta chpB$          | PMID: 17337585      | SMC2990 (O'Toole Strain Collection) |                           |
| Strain, strain background ( <i>Pseudomonas aeruginosa</i> ) | PA14 $\Delta chpC$          | This study          | PADHL445                            | See Methods and Materials |
| Strain, strain background ( <i>Pseudomonas aeruginosa</i> ) | PA14 $\Delta chpD$          | This study          | PADHL459                            | See Methods and Materials |
| Strain, strain background ( <i>Pseudomonas aeruginosa</i> ) | PA14 $\Delta chpE$          | This study          | PADHL460                            | See Methods and Materials |

|                                                             |                                                |                |                                     |                           |
|-------------------------------------------------------------|------------------------------------------------|----------------|-------------------------------------|---------------------------|
| ( <i>Pseudomonas aeruginosa</i> )                           |                                                |                |                                     |                           |
| Strain, strain background ( <i>Pseudomonas aeruginosa</i> ) | PA14 <i>pil::Tn</i>                            |                | PA14 Ordered Transposon Library     |                           |
| Strain, strain background ( <i>Pseudomonas aeruginosa</i> ) | PA14 $\Delta pilG$                             |                | SMC4375 (O'Toole Strain Collection) |                           |
| Strain, strain background ( <i>Pseudomonas aeruginosa</i> ) | PA14 $\Delta pilH$                             |                | SMC4376 (O'Toole Strain Collection) |                           |
| Strain, strain background ( <i>Pseudomonas aeruginosa</i> ) | PA14 <i>pilB::Tn</i>                           |                | PA14 Ordered Transposon Library     |                           |
| Strain, strain background ( <i>Pseudomonas aeruginosa</i> ) | PA14 $\Delta pilT$                             | PMID: 36073942 | SMC7302 (O'Toole Strain Collection) |                           |
| Strain, strain background ( <i>Pseudomonas aeruginosa</i> ) | PA14 $\Delta pilU$                             | PMID: 36073942 | SMC7304 (O'Toole Strain Collection) |                           |
| Strain, strain background ( <i>Pseudomonas aeruginosa</i> ) | PA14 $\Delta fimX$                             |                | SMC6290 (O'Toole Strain Collection) |                           |
| Strain, strain background ( <i>Pseudomonas aeruginosa</i> ) | PA14 $\Delta pilZ$                             | PMID: 27114465 | SMC5569 (O'Toole Strain Collection) |                           |
| Strain, strain background ( <i>Pseudomonas aeruginosa</i> ) | PA14 $\Delta fimV$                             |                | SMC6726 (O'Toole Strain Collection) |                           |
| Strain, strain background ( <i>Pseudomonas aeruginosa</i> ) | PA14 $\Delta flgK$                             | PMID: 9791175  | SMC5845 (O'Toole Strain Collection) |                           |
| Strain, strain background ( <i>Pseudomonas aeruginosa</i> ) | PA14 $\Delta pilJ \Delta flgK$                 | This study     | PADHL266                            | See Methods and Materials |
| Strain, strain background ( <i>Pseudomonas aeruginosa</i> ) | PA14 <i>pilJ</i> $\Delta_{LBD1-2} \Delta flgK$ | This study     | PADHL514                            | See Methods and Materials |
| Strain, strain background ( <i>Pseudomonas aeruginosa</i> ) | PA14 <i>pilJ</i> $_{Q412A, E413A} \Delta flgK$ | This study     | PADHL515                            | See Methods and Materials |
| Strain, strain background ( <i>Pseudomonas aeruginosa</i> ) | PA14 $\Delta pilK \Delta flgK$                 | This study     | PADHL392                            | See Methods and Materials |

|                                                                |                                                                                                         |                |                                        |                                                                             |
|----------------------------------------------------------------|---------------------------------------------------------------------------------------------------------|----------------|----------------------------------------|-----------------------------------------------------------------------------|
| Strain, strain background<br>( <i>Pseudomonas aeruginosa</i> ) | PA14 $\Delta$ <i>chpB</i> $\Delta$ <i>flgK</i>                                                          | This study     | PADHL393                               | See Methods and Materials                                                   |
| Strain, strain background<br>( <i>Pseudomonas aeruginosa</i> ) | PA14 WT + pMQ80- <i>P</i> <sub>araBAD</sub> - <i>pilJ</i>                                               |                | SMC6793<br>(O'Toole Strain Collection) |                                                                             |
| Strain, strain background<br>( <i>Pseudomonas aeruginosa</i> ) | PA14 $\Delta$ <i>pilJ</i> + pMQ80- <i>P</i> <sub>araBAD</sub> - <i>pilJ</i>                             |                | SMC6790<br>(O'Toole Strain Collection) |                                                                             |
| Strain, strain background<br>( <i>Pseudomonas aeruginosa</i> ) | PA14 <i>pilJ</i> <sub><math>\Delta</math>LBD1-2</sub> + pMQ80- <i>P</i> <sub>araBAD</sub> - <i>pilJ</i> | This study     | PADHL549                               | See Methods and Materials; Plasmid obtained from George O'Toole (Dartmouth) |
| Strain, strain background<br>( <i>Pseudomonas aeruginosa</i> ) | PA14 <i>pilJ</i> <sub>Q412A, E413A</sub> + pMQ80- <i>P</i> <sub>araBAD</sub> - <i>pilJ</i>              | This study     | PADHL551                               | See Methods and Materials; Plasmid obtained from George O'Toole (Dartmouth) |
| Strain, strain background<br>( <i>Pseudomonas aeruginosa</i> ) | PA14 WT + pMQ80- <i>P</i> <sub>araBAD</sub> - <i>pilK</i>                                               |                | SMC6794<br>(O'Toole Strain Collection) |                                                                             |
| Strain, strain background<br>( <i>Pseudomonas aeruginosa</i> ) | PA14 $\Delta$ <i>pilK</i> + pMQ80- <i>P</i> <sub>araBAD</sub> - <i>pilK</i>                             | This study     | PADHL537                               | See Methods and Materials; Plasmid obtained from George O'Toole (Dartmouth) |
| Strain, strain background<br>( <i>Pseudomonas aeruginosa</i> ) | PA14 WT + pMQ80- <i>P</i> <sub>araBAD</sub> - <i>chpB</i>                                               |                | SMC6795<br>(O'Toole Strain Collection) |                                                                             |
| Strain, strain background<br>( <i>Pseudomonas aeruginosa</i> ) | PA14 $\Delta$ <i>chpB</i> + pMQ80- <i>P</i> <sub>araBAD</sub> - <i>chpB</i>                             |                | SMC6791<br>(O'Toole Strain Collection) |                                                                             |
| Strain, strain background<br>( <i>Pseudomonas aeruginosa</i> ) | PAO1 WT + pP <i>xhpA-yfp</i><br><i>PrpoD-mKate2</i>                                                     | PMID: 26041805 | SMC7431<br>(O'Toole Strain Collection) |                                                                             |
| Strain, strain background<br>( <i>Pseudomonas aeruginosa</i> ) | PA14 WT + pP <i>xhpA-yfp</i><br><i>PrpoD-mKate2</i>                                                     |                | SMC7438<br>(O'Toole Strain Collection) |                                                                             |
| Strain, strain background<br>( <i>Pseudomonas aeruginosa</i> ) | PA14 $\Delta$ <i>pilJ</i> + pP <i>xhpA-yfp</i><br><i>PrpoD-mKate2</i>                                   | This study     | PADHL501                               | See Methods and Materials; Plasmid obtained from George                     |



|                                                             |                                                                            |                     |                                                             |                                                                             |
|-------------------------------------------------------------|----------------------------------------------------------------------------|---------------------|-------------------------------------------------------------|-----------------------------------------------------------------------------|
|                                                             |                                                                            |                     |                                                             | O'Toole (Dartmouth)                                                         |
| Strain, strain background ( <i>Pseudomonas aeruginosa</i> ) | PA14 <i>pilJ</i> <sub>ΔLBD1-2</sub> + pP <i>xhpA-yfp PrpoD-mKate2</i>      | This study          | PADHL530                                                    | See Methods and Materials; Plasmid obtained from George O'Toole (Dartmouth) |
| Strain, strain background ( <i>Pseudomonas aeruginosa</i> ) | PA14 <i>pilJ</i> <sub>Q412A, E413A</sub> + pP <i>xhpA-yfp PrpoD-mKate2</i> | This study          | PADHL531                                                    | See Methods and Materials; Plasmid obtained from George O'Toole (Dartmouth) |
| Strain, strain background ( <i>Pseudomonas aeruginosa</i> ) | PA14 $\Delta$ <i>pilK</i> + pP <i>xhpA-yfp PrpoD-mKate2</i>                | This study          | PADHL508                                                    | See Methods and Materials; Plasmid obtained from George O'Toole (Dartmouth) |
| Strain, strain background ( <i>Pseudomonas aeruginosa</i> ) | PA14 $\Delta$ <i>chpB</i> + pP <i>xhpA-yfp PrpoD-mKate2</i>                | This study          | PADHL509                                                    | See Methods and Materials; Plasmid obtained from George O'Toole (Dartmouth) |
| Strain, strain background ( <i>Pseudomonas aeruginosa</i> ) | PA14 $\Delta$ <i>cyaB</i>                                                  | PMID: 25626906      | SMC6852 (O'Toole Strain Collection)                         |                                                                             |
| Strain, strain background ( <i>Pseudomonas aeruginosa</i> ) | PA14 $\Delta$ <i>cpdA</i>                                                  | PMID: 25626906      | SMC6851 (O'Toole Strain Collection)                         |                                                                             |
| Strain, strain background ( <i>Pseudomonas aeruginosa</i> ) | PA14 $\Delta$ <i>vfr</i>                                                   | PMID: 25626906      | SMC6722 (O'Toole Strain Collection)                         |                                                                             |
| Strain, strain background ( <i>Staphylococcus aureus</i> )  | USA300 LAC JE2 (WT)                                                        | PMID: 23404398      | USA300 CA-Methicillin resistant strain LAC without plasmids | Obtained from Ambrose Cheung (Dartmouth)                                    |
| Strain, strain background ( <i>Escherichia coli</i> )       | DH5 $\alpha$                                                               | New England Biolabs | C2987H                                                      |                                                                             |
| Strain, strain background ( <i>Escherichia coli</i> )       | S17 $\lambda$ pir                                                          | Life Technologies   |                                                             |                                                                             |
| Recombinant DNA reagent                                     | pEXG2-Tc                                                                   |                     |                                                             | Obtained from Timothy Yahr                                                  |

|                         |                               |                            |                           |                      |
|-------------------------|-------------------------------|----------------------------|---------------------------|----------------------|
|                         |                               |                            |                           | (University of Iowa) |
| Commercial assay or kit | Gibson Assembly Cloning Kit   | New England Biolabs        | E5510S                    |                      |
| Commercial assay or kit | QIAquick PCR Purification Kit | Qiagen                     | 28104                     |                      |
| Commercial assay or kit | QIAquick Gel Purification Kit | Qiagen                     | 28704                     |                      |
| Commercial assay or kit | Genra Puregene Yeast/Bac Kit  | Qiagen                     | Discontinued              |                      |
| Commercial assay or kit | QIAprep Spin Miniprep Kit     | Qiagen                     | 27104                     |                      |
| Software, algorithm     | NIS-Elements AR               | Nikon                      | Version 5.20.01<br>64-bit |                      |
| Software, algorithm     | ZEN                           | Zeiss                      | Version 2.6               |                      |
| Software, algorithm     | Fiji                          | ImageJ                     | Version 2.0.0             |                      |
| Software, algorithm     | GraphPad Prism                | GraphPad Software          | Version 9.3.1             |                      |
| Software, algorithm     | Python                        | Python Software Foundation | Version 3.10              |                      |

659  
660  
661

**Table 1. Oligonucleotides used in this study.**

| Name                             | Sequence 5' – 3'                                                                                                                                                                                                                                                                                       | Reference             |
|----------------------------------|--------------------------------------------------------------------------------------------------------------------------------------------------------------------------------------------------------------------------------------------------------------------------------------------------------|-----------------------|
| pilJ_upF-pEXG2-Tc                | CTTCTGCAGGTCGACTCTAGATGACCAAGGACGCCGAGACC                                                                                                                                                                                                                                                              | This study<br>oDHL198 |
| pilJ_dnR-pEXG2-Tc                | TAAGGTACCGAATTCGAGCTCCACATCGCCAGCGAGTAGGGT                                                                                                                                                                                                                                                             | This study<br>oDHL199 |
| pilJ-LBD_upR                     | ATGCTACGCCCGCCGGCAAAGTTGGCGAACAGCAA                                                                                                                                                                                                                                                                    | This study<br>oDHL225 |
| pilJ-LBD_dnF                     | TCGCCAACTTTGCCGGCGGGCGTAGCATCAACC                                                                                                                                                                                                                                                                      | This study<br>oDHL226 |
| pilJ-Q412A-E413A_upR             | GTAGTTGATCGAGTCGGCGATGGC                                                                                                                                                                                                                                                                               | This study<br>oDHL246 |
| pilJ-Q412A-E413A_dnF             | CAGGCGCAGGAAATCGCCG                                                                                                                                                                                                                                                                                    | This study<br>oDHL247 |
| pilJ-Q412A-E413A-Gene Block      | ACTCGATCAACTACTCCATCGACCAGCTCCGCGAACTGGTGGAG<br>ACCATCAACCAGACCGCCGTGCAGGTGGCCGCAGCGGCCGCG<br>GCAACCCAGTCCACCGCGATGCACCTGGCCGAAGCCTCCGAGC<br>ACCAGGCGCAGGAAAT                                                                                                                                          | This study<br>oDHL249 |
| pilJ-Q623A-Q624A/Q639A-E640A_upR | CTCGATCTCCTCCAGGGCC                                                                                                                                                                                                                                                                                    | This study<br>oDHL262 |
| pilJ-Q623A-Q624A/Q639A-E640A_dnF | GCAGGCCTGAGCATAGGCG                                                                                                                                                                                                                                                                                    | This study<br>oDHL263 |
| pilJ-Q623A-Q624A-Gene Block      | TGGAGGAGATCGAGAAGGTATCCAAGACCCTCGCGGCACTGAT<br>CCAGAACATCTCCAACGCCGCCCGT <b>GCGGCG</b> GCATCGTCGGCC<br>GGCCACATTTCCAACACCATGAACGTCATTGAGGAGATCACCTC<br>GCAGACCTCCGCCGGTACCACCGCCACCGCGCGGAGCATCGG<br>CAACCTGGCGAAGATGGCGAGCGAGATGCGCAACTCGGTATCC<br>GGCTTCAAACCTGCCGGAGGGCGTGGAGCAGGCCTGAGCATAG<br>GCG | This study<br>oHDL259 |
| pilJ-Q639A-E640A-Gene Block      | TGGAGGAGATCGAGAAGGTATCCAAGACCCTCGCGGCACTGAT<br>CCAGAACATCTCCAACGCCGCCCGT <b>GCGGCG</b> GCATCGTCGGCC<br>GGCCACATTTCCAACACCATGAACGTCATT <b>GCGGCG</b> ATCACCTC<br>GCAGACCTCCGCCGGTACCACCGCCACCGCGCGGAGCATCGG<br>CAACCTGGCGAAGATGGCGAGCGAGATGCGCAACTCGGTATCC                                              | This study<br>oHDL260 |

|                |                                                  |                       |
|----------------|--------------------------------------------------|-----------------------|
|                | GGCTTCAAAGTCCGGAGGGCGTGGAGCAGGCCTGAGCATAG<br>GCG |                       |
| piJ-80-273_upR | GCCGCTTCCC GGACGAACGCCTCGCCCTTGCC                | This study<br>oDHL227 |
| piJ-80-273_dnF | AGGGCGAGGCGTTCGTCCGGGAAGCGGCGAAC                 | This study<br>oDHL228 |

662

663 **Methods and Materials**

664

665 **Bacterial strains and culture conditions:** *P. aeruginosa* PA14 or PAO1 and *S. aureus* JE2 strains were cultured  
666 in tryptic soy broth (TSB; Becton Dickenson) or M8 minimal media broth supplemented with 0.2% glucose and 1.2%  
667 tryptone (M8T) with aeration at 37°C. The following antibiotics were added for *P. aeruginosa* cultures when  
668 appropriate: carbenicillin (200 µg/mL), gentamicin (30 µg/mL), tetracycline (100 µg/mL). *Escherichia coli* strains for  
669 cloning were cultured in lysogeny broth (LB; 1% tryptone, 0.5% yeast extract, 1% sodium chloride). The following  
670 antibiotics were added for *E. coli* when appropriate: ampicillin (100 µg/mL), gentamicin (15 µg/mL), tetracycline (12  
671 µg/mL). All strains used in this study can be found in the Key Resources Table.

672

673 **Generating *P. aeruginosa* mutants:** *P. aeruginosa* mutants in this study were generated by allelic exchange at  
674 the native site in the chromosome using Gibson Assembly with a pEXG2-Tc vector containing the DNA mutation  
675 between restriction sites SacI and XbaI (Hmelo et al., 2015). Mutant constructs were generated by PCR amplifying  
676 ~1 kb DNA fragments upstream and downstream of the gene or region of interest while substitution mutants were  
677 generated by synthesis of a DNA fragment gene block containing the correct codon change (Integrated DNA  
678 Technologies, Coralville, IA, USA). Assembled vectors were transformed into *E. coli* DH5 $\alpha$ , then into *E. coli* S17 for  
679 conjugation into *P. aeruginosa*. Correct mutations in *P. aeruginosa* were verified with PCR and Sanger sequencing.  
680 *P. aeruginosa*  $\Delta pilK$ ,  $\Delta chpB$ ,  $\Delta pilJ$  deletion mutants and *pilJ* LBDs and methylation site mutants were complemented  
681 by electroporating the respective mutant with expression vector pMQ80 containing the full-length gene under control  
682 of the arabinose-inducible P<sub>BAD</sub> promoter and fused to a C-terminal GFP tag (Shanks et al., 2006). All  
683 oligonucleotides used to generate *P. aeruginosa* mutants can be found in Table 1.

684

685 **Macroscopic coculture twitching chemotaxis assay:** Motility experiments were performed as previously  
686 described (Kearns et al., 2001; Limoli et al., 2019; Miller et al., 2008). Buffered agar plates (recipe: 10 mM Tris, pH  
687 7.6; 8 mM MgSO<sub>4</sub>; 1 mM NaPO<sub>4</sub>, pH 7.6; and 1.5% agar) were poured and allowed to solidify for 1 hour prior to  
688 incubation for 16 hours at 37°C and 22% humidity. After solidifying, 4 µL of either growth medium (TSB) or cell-free  
689 supernatant derived from an overnight culture of *S. aureus* at OD<sub>600</sub> 5.0 and filter sterilized with a 0.22 µm filter were  
690 spotted on the surface of the plate and allowed to diffuse for 24 hours at 37°C and 22% humidity to establish a  
691 gradient. *P. aeruginosa* cultures were incubated overnight in TSB with aeration at 37°C, subcultured 1:100 in TSB  
692 the following morning, then standardized to OD<sub>600</sub> 12.0 in 100 µL of 1 mM MOPS buffer supplemented with 8 mM  
693 MgSO<sub>4</sub> prior to inoculating 1 µL on the surface of the plate at five mm from the center of the gradient. Plates were  
694 incubated in a single layer, agar-side down, for 24 hours at 37°C with 22% humidity, followed by an additional 16  
695 hours at room temperature prior to imaging the motility response of *P. aeruginosa*. Images were captured using a  
696 Zeiss stereoscope with Zeiss Axiocam 506 camera and directional motility ratios were calculated in Fiji before  
697 graphing and performing statistical analysis in GraphPad Prism.

698

699 **Macroscopic coculture subsurface twitching assay:** The assay was modified from a previous protocol, as shown  
700 before (Limoli et al., 2019; Turnbull & Whitchurch, 2014). Prior to pouring plates, 200 µL of either growth medium  
701 (TSB) or cell-free supernatant derived from an overnight culture of *S. aureus* at OD<sub>600</sub> 2.0 and filter sterilized with a

702 0.22  $\mu\text{m}$  filter were spread on the bottom of a 120 mm square petri plate. Tryptic soy agar (1.5%) was then poured  
703 into the plates and allowed to dry for 4.5 hours at room temperature. *P. aeruginosa* cultures were incubated  
704 overnight in TSB with aeration at 37°C, subcultured 1:100 in TSB the following morning, then standardized to OD<sub>600</sub>  
705 2.0 in 1 mL TSB. A sterile toothpick was dipped into the standardized culture, then stabbed to the bottom of the  
706 agar plate. Plates were incubated in a single-layer, agar-side down, at 37°C with 22% humidity for 24 hours, followed  
707 by an additional 24 hours at room temperature. Following incubation, the agar was removed from the plates and  
708 the motility diameters were measured in mm. Diameter measurements were graphed and analyzed in GraphPad  
709 Prism.

710

711 **Live-imaging and tracking of *P. aeruginosa* directional response to *S. aureus*:** To visualize single-cell motility  
712 behavior and measure cAMP in individual cells, *P. aeruginosa* cells were imaged using a previously described  
713 method (Limoli et al., 2019; Yarrington et al., 2020). *P. aeruginosa* and *S. aureus* were grown in M8T medium  
714 overnight at 37°C with aeration, subcultured the next day in fresh M8T and grown to mid-log phase at 37°C with  
715 aeration. Cultures were standardized to OD<sub>600</sub> of 0.015 to 0.03 for *P. aeruginosa* or 0.05 to 0.1 for *S. aureus*. For  
716 coculture experiments, *P. aeruginosa* and *S. aureus* were mixed 1:1. One  $\mu\text{L}$  of mono- or coculture cells were  
717 inoculated onto a 10 mm diameter glass coverslip in a 35 mm dish before placing an agarose pad on top. Pads  
718 were made by pipetting 920  $\mu\text{L}$  of M8T with 2% molten agarose into a 35 mm dish containing a 10 mm diameter  
719 mold and drying uncovered for 1 hour at room temperature, followed by 1 hour 15 minutes at room temperature  
720 covered with a lid, then 1 hour at 37°C before transferring the pad onto the inoculated coverslip. Time-lapse imaging  
721 was performed with an inverted Nikon Ti2 Eclipse microscope, 100x oil objective (1.45 NA), and Andor Sona  
722 camera. Phase contrast images were acquired every 20 minutes for 2 hours, then every 1 second for 3-4 hours  
723 with 100 ms exposure and 20% DIA LED light. Fluorescent images were acquired every 20 minutes with TxRed  
724 images taken at 100 ms exposure and 20% Sola fluorescent light and YFP imaged at 25 ms exposure and 20%  
725 Sola fluorescent light.

726

727 Images were analyzed using Nikon NIS-Elements AR software. To automatically track movements of single cells,  
728 bacterial cells in the phase channel were first converted into binary objects by thresholding to the dark bacterial  
729 cells. The Tracking Module in NIS-Elements was then used to form trajectories for all binary objects. Specifically,  
730 the following parameters were used: objects have a minimum area of 1  $\mu\text{m}^2$ , track with random motion model, find  
731 center of object based on area, no maximum speed limit of each object track, allow new tracks after the first frame  
732 in file and track objects backwards to previous frames. Tracks were allowed up to 60 gaps (frames) per track and  
733 any tracks with less than 180 frames were automatically removed from the final trajectories. Trajectories were  
734 exported and analyzed in Python using the parameters described below.

735

736 **Principal direction of single-cell trajectories:** The gyration tensor, commonly employed in polymer physics  
737 determines the principal direction of each single-cell trajectory  $i$  (Kim & Baig, 2016). The shape of each random  
738 walk is described by the gyration tensor

739

$$\mathbf{G}_i = \frac{1}{N} \sum_t^N (\vec{r}(t) - \vec{r}_i^{cm}) \otimes (\vec{r}(t) - \vec{r}_i^{cm}),$$

740

(1)

741 for a trajectory of  $N$  time steps each at position  $\vec{r}(t)$  at time  $t$  and center of mass position  $\vec{r}_i^{\text{cm}}$ . Eigendecomposition  
742 of the gyration tensor determines the largest eigenvalue and the associated eigenvector  $\hat{e}_i^{\parallel}$  is identified as the  
743 principal direction of motion for the  $i^{\text{th}}$  trajectory. The sign of  $\hat{e}_i^{\parallel}$  is chosen by setting the direction of motion parallel  
744 to the end-to-end vector. The principal direction is determined without any information about the location of *S.*  
745 *aureus* colonies or other *P. aeruginosa* cells. Rose graphs shown in Figures 2-4 present histograms of  $\hat{e}_i^{\parallel}$ .

746

747 **Directed Mean-Squared Displacement:** The mean-squared displacement (MSD)

748 
$$\Delta r^2(\Delta t) = \langle \Delta \vec{r}(\Delta t; t) \cdot \Delta \vec{r}(\Delta t; t) \rangle$$

749

(2)

750 of displacement vectors  $\Delta \vec{r}(\Delta t; t) = \vec{r}(t + \Delta t) - \vec{r}(t)$  is a measure of the distance gone after a lag time  $\Delta t$ , where  
751 the average  $\langle \cdot \rangle$  is the ensemble average over all trajectories  $i$  and all times  $t$  within that trajectory. While the MSD  
752 quantifies the degree of motion, it assumes isotropic dynamics and so does not discern between any potential  
753 directionality in microbial motion. Quantifying the degree of motion parallel and perpendicular to the principal  
754 direction requires decomposing the movement into components parallel and perpendicular to each principal  
755 direction  $\hat{e}_i^{\parallel}$ . The displacement in the principal direction is  $\Delta \vec{r}_{\parallel} = (\Delta \vec{r} \cdot \hat{e}_i^{\parallel}) \hat{e}_i^{\parallel}$  and the orthogonal direction is  $\Delta \vec{r}_{\perp} =$   
756  $\Delta \vec{r} - \Delta \vec{r}_{\parallel}$ . From these, the parallel and perpendicular MSD are

757 
$$\Delta r_{\parallel}^2(\Delta t) = \langle \Delta \vec{r}_{\parallel} \cdot \Delta \vec{r}_{\parallel} \rangle$$

758 
$$\Delta r_{\perp}^2(\Delta t) = \langle \Delta \vec{r}_{\perp} \cdot \Delta \vec{r}_{\perp} \rangle.$$

759

(3)

760 To characterize the MSDs, the anomalous exponent  $\alpha$  defined by the power law

761 
$$\Delta r^2(\Delta t) \sim \Delta t^{\alpha}.$$

762

(4)

763 Exponents of  $\alpha = 1$  describe diffusive dynamics, while  $\alpha < 1$  represents subdiffusive motion and  $\alpha > 1$   
764 superdiffusive.

765

766 **Displacement probability distributions:** The MSD can be deceiving since it is known that a broad class of  
767 diffusive dynamics exist in soft matter, biological, and complex systems for which the dynamics are “Brownian yet  
768 non-Gaussian” (Checkkin et al., 2017; Metzler, 2020). In such systems, the MSD appears diffusive with anomalous  
769 exponent  $\alpha = 1$  but the probability density function (PDF) of steps  $P(\Delta r; \Delta t)$  is non-Gaussian, a traditional  
770 assumption for Brownian motion. The probability of finding a bacterium  $\Delta r$  after some lag time  $\Delta t$  is called the van  
771 Hove self-correlation function and it has proven useful in understanding the dynamics of simulations of twitching  
772 bacteria (Nagel et al., 2020). The formal definition of the van Hove self-correlation function is

773  
774  
775  
776  
777  
778  
779  
780  
781  
782  
783  
784  
785  
786  
787  
788  
789  
790  
791  
792  
793  
794  
795  
796  
797  
798  
799  
800  
801  
802  
803  
804  
805

$$P(\Delta\vec{r}; \Delta t) = \frac{1}{N} \left\langle \sum_{j=1}^N \delta(\Delta\vec{r} - [\vec{r}(t + \Delta t) - \vec{r}(t)]) \right\rangle. \quad (5)$$

To consider the probability that *P. aeruginosa* cells move a given distance towards *S. aureus* colonies, the van Hove function is found for steps parallel or orthogonal to the principal direction of motion,  $\Delta\vec{r}_{\parallel}$  and  $\Delta\vec{r}_{\perp}$  respectively. There are two probability density functions of particular interest here.

(i) The first is a Gaussian diffusive distribution

$$P_G(\Delta r; \Delta t) = \frac{1}{(4\pi D \Delta t)^{1/2}} \exp\left(-\frac{\Delta r^2}{4D \Delta t}\right), \quad (6)$$

for a random process with diffusion coefficient  $D$ . This form can be scaled in time to collapse the distribution to  $\tilde{P}_G(\Delta r) \sim e^{-\Delta\tilde{r}^2}$ , where  $\tilde{P}_G = \Delta t^{1/2} P_G$  and  $\Delta\tilde{r} = \Delta t^{-1/2} \Delta r$ . Thus, observing a Gaussian distribution at only one lag time is insufficient for determining Fickian diffusivity. An example of this is the microscopy imaging noise (Figure 2 – figure supplement 4A): although the step size distributions are Gaussian, they do not scale in time for lag times  $\Delta t < 300s$ , a distinct indication that this is a measure of the tracking noise and not diffusion of the dust particle.

(ii) The second probability density functions of interest is a Laplace distribution

$$P_L(\Delta r; \Delta t) = \frac{1}{2\lambda} \exp\left(-\frac{|\Delta r|}{\lambda}\right), \quad (7)$$

for a decay length  $\lambda$ . Laplace distributions have longer tails than Gaussian distributions and have emerged as a canonical example of non-Gaussian functions that lead to Brownian MSDs (Chechkin et al., 2017; Metzler, 2020). If the decay length scales with lag time as  $\lambda = (\langle D \rangle \Delta t)^{1/2}$  for an average diffusivity  $\langle D \rangle$  then the MSD scales diffusively. In this case, the distributions can be collapsed with the same scaling as the Gaussian distributions,  $\tilde{P}_L(\Delta r) \sim e^{-|\Delta\tilde{r}|}$ , where  $\tilde{P}_L = \Delta t^{1/2} P_L$  and  $\Delta\tilde{r} = \Delta t^{-1/2} \Delta r$ .

The probability density distributions of step sizes are typically dominated by a sharp narrow peak of highly-likely small step sizes, which represents jiggling and long tails of rare-but-large step sizes (Figures 2-4) (Kühn et al., 2021). The long tails are primarily exponential. It is tempting to think that the narrow peak of small steps sizes represents the imaging uncertainty. However, we find that the standard deviation of the imaging distribution is  $1.4 \times 10^{-2} \mu m$  (Figure 2 – figure supplement 4A), narrower than the width of the primary van Hove peak (Figure 2 – figure supplement 4B). Indeed, the narrow peak is not Gaussian at all, but rather better fit by a second Laplace distribution. Thus, the displacement probability density distributions are well described as double Laplace functions (Figure 2 – figure supplement 4B).



806 **Identifying subpopulations of persistent movers and resters:** Qualitative assessment of the microscopy data  
807 makes it apparent that *P. aeruginosa* cells possess two dynamic modes:

- 808 1. Persistent “Resters”: Colony-associate *P. aeruginosa* cells do not exhibit an active exploratory motion.  
809 Instead, the motion of these cells is composed of small ‘jiggling’ and expansion due to colony growth.
- 810 2. Persistent “Movers”: These are cells that have left the colony to actively move through the surroundings,  
811 either as individuals or in multi-cell rafts. Like “resters”, these “movers” exhibit small jittering motion but also  
812 intermittently persistent motion. The intermittency of the motion can at times have a run-reversal-type or a  
813 run-rest-type character, but a “mover” is not simply a continually moving bacterium.

814 Both of these dynamic modes are composed of small jittery motion and larger motions, which makes it difficult to  
815 algorithmically separate the cells into subpopulations of movers and resters.

816

817 To disentangle the subpopulations, we consider the velocity-velocity correlation function  $C_i^{vv}(\Delta t)$  for lagtime  $\Delta t$  for  
818 each bacterium  $i$  averaged over start times. The velocity autocorrelation function takes into account both the  
819 direction and speed of the bacteria. Rather than averaging the correlation function over all possible start times within  
820 trajectory  $i$ , we employ a rolling velocity autocorrelation

$$821 C_i^{vv}(\Delta t; t) = \left| \langle \vec{v}(t + \tau) \cdot \vec{v}(t + \tau + \Delta t) \rangle_{\tau \leq T} \right|, \quad (8)$$

822

823 where  $t$  is each time point in the trajectory,  $T$  is the rolling window duration,  $\tau$  is every possible starting time within  
824 the rolling window and the average  $\langle \cdot \rangle_{\tau \leq T}$  is over all starting times. Since run-reversal dynamics are likely to be an  
825 aspect of the dynamics, we consider the absolute value of the velocity autocorrelation. If the duration  $T$  is too short  
826 then the correlation functions are overly noisy but if it is too long then instances of correlated motion is smeared  
827 out. To assess the immediate degree of correlation in motion, the correlation function is averaged over the duration  
828 to produce a correlation constant  $c_{vv}^T(t) = \langle C_i^{vv}(\Delta t; t) \rangle_{\Delta t \leq T}$ . The correlation constant acts as a signal of immediately  
829 persistent motion, with persistent resters showing near-zero  $c_{vv}^T(t)$  and movers having significantly larger values  
830 above a cutoff  $c^*$ . While  $c_{vv}^T(t)$  matches our expectations from qualitative observations of the microscopy movies,  
831 false positive instances of colony-associated cells occur. Thus, the signal is weighted by the behavior of neighboring  
832 cells

$$833 s(t; T, c^*, R) = \langle \theta(c_{vv}^T(t) - c^*) \rangle_{r \leq R}, \quad (9)$$

834

835 where  $\theta(\cdot)$  is the Heaviside step function and the average is over all neighbouring cells in the vicinity of  $r \leq R$ .  
836 Finally, the neighbor-weighted signal  $s$  is given a cutoff  $s^*$ , above which cells are identified as “persistent movers”  
837 and below which they are “persistent resters.” The parameters are chosen to be  $T = 30s$ ,  $c^* = 0.01$ ,  $R = 6\mu m$  and  
838  $s^* = 0.75$  for this study. Due to the intermittent nature of the twitching dynamics, once a bacterium has been  
839 identified as a mover, it keeps a mover-designation until the trajectory is lost.

840

841 **Quantification of intracellular cAMP:** To quantify cAMP in individual cells, time-lapse imaging was performed with  
842 *P. aeruginosa* cells carrying the *PxphA-yfp PrpoD-mKate2* dual fluorescent reporter (Persat et al., 2015).

843 Thresholding of bacterial cells in the red channel to the constitutively expressed *PrpoD-mKate2* fluorescence  
844 generated binary objects. The fluorescence of these binaries was then measured in the YFP channel for levels of  
845 *PxphA-yfp* expression. For total cAMP in a frame at a given time point, the ratio of YFP over mKate2 intensity for  
846 each bacterial cell was calculated, then summed with all other bacterial cells. For normalization, the total  
847 YFP/mKate2 ratio from all objects in the frame was normalized to the average area of all binary objects in the same  
848 frame. The ratios for each time point were then graphed and analyzed in GraphPad Prism.  
849

850 **Acknowledgements:** This work was supported by funding from the CFF Postdoc-to-Faculty Transition Award  
851 (LIMOLI18F5), CFF RDP Junior Faculty Recruitment Award (LIMOLI19R3), NIH (R35GM142760), CFF Student  
852 Traineeship Award (YARRIN21H0), and the European Research Council (ERC) under the European Union's  
853 Horizon 2020 research and innovation programme (Grant agreement No. 851196). We thank Drs. George O'Toole  
854 and Sherry Kuchma for *P. aeruginosa* and *E. coli* bacterial strains. We also thank Dr. J. Muse Davis for use of the  
855 stereoscope and Dr. Timothy Yahr for the pEXG2-Tc cloning vector. We are grateful to George O'Toole and  
856 members of the Limoli Lab for thoughtful discussions and feedback on the manuscript.

857  
858 **Competing interests:** The authors have no competing interests to declare.

## 859 **References**

- 860 Alexander, R. P., & Zhulin, I. B. (2007). Evolutionary genomics reveals conserved structural determinants of  
861 signaling and adaptation in microbial chemoreceptors. *Proceedings of the National Academy of Sciences*,  
862 104(8), 2885-2890. <https://doi.org/10.1073/pnas.0609359104>
- 863 Astling, D. P., Lee, J. Y., & Zusman, D. R. (2006). Differential effects of chemoreceptor methylation-domain  
864 mutations on swarming and development in the social bacterium *Myxococcus xanthus*. *Molecular*  
865 *Microbiology*, 59(1), 45-55. <https://doi.org/10.1111/j.1365-2958.2005.04926.x>
- 866 Berg, H. C., & Brown, D. A. (1972). Chemotaxis in *Escherichia coli* analysed by three-dimensional tracking. *Nature*,  
867 239(5374), 500-504. <https://doi.org/10.1038/239500a0>
- 868 Burrows, L. L. (2012). *Pseudomonas aeruginosa* twitching motility: type IV pili in action. *Annual Review of*  
869 *Microbiology*, 66(1), 493-520. <https://doi.org/10.1146/annurev-micro-092611-150055>
- 870 Carabelli, A. M., Isgró, M., Sanni, O., Figueredo, G. P., Winkler, D. A., Burroughs, L., Blok, A. J., Dubern, J.-F.,  
871 Pappalardo, F., Hook, A. L., Williams, P., & Alexander, M. R. (2020). Single-cell tracking on polymer  
872 microarrays reveals the impact of surface chemistry on *Pseudomonas aeruginosa* twitching speed and  
873 biofilm development. *ACS Applied Bio Materials*, 3(12), 8471-8480.  
874 <https://doi.org/10.1021/acsabm.0c00849>
- 875 Chechkin, A. V., Seno, F., Metzler, R., & Sokolov, I. M. (2017). Brownian yet non-gaussian diffusion: from  
876 superstatistics to subordination of diffusing diffusivities. *Physical Review X*, 7(2).  
877 <https://doi.org/10.1103/physrevx.7.021002>
- 878 Darzins, A. (1994). Characterization of a *Pseudomonas aeruginosa* gene cluster involved in pilus biosynthesis and  
879 twitching motility: sequence similarity to the chemotaxis proteins of enterics and the gliding bacterium  
880 *Myxococcus xanthus*. *Molecular Microbiology*, 11(1), 137-153. <https://doi.org/10.1111/j.1365-2958.1994.tb00296.x>
- 881
- 882 Darzins, A. (2006). The *Pseudomonas aeruginosa pilK* gene encodes a chemotactic methyltransferase (CheR)  
883 homologue that is translationally regulated. *Molecular Microbiology*, 15(4), 703-717.  
884 <https://doi.org/10.1111/j.1365-2958.1995.tb02379.x>
- 885 Delange, P. A., Collins, T. L., Pierce, G. E., & Robinson, J. B. (2007). PilJ localizes to cell poles and is required for  
886 type IV pilus extension in *Pseudomonas aeruginosa*. *Current Microbiology*, 55(5), 389-395.  
887 <https://doi.org/10.1007/s00284-007-9008-5>
- 888 Deleon, S., Clinton, A., Fowler, H., Everett, J., Horswill, A. R., & Rumbaugh, K. P. (2014). Synergistic interactions  
889 of *Pseudomonas aeruginosa* and *Staphylococcus aureus* in an *in vitro* wound model. *Infection and*  
890 *Immunity*, 82(11), 4718-4728. <https://doi.org/10.1128/iai.02198-14>
- 891 Fischer, A. J., Singh, S. B., LaMarche, M. M., Maakestad, L. J., Kienenberger, Z. E., Pena, T. A., Stoltz, D. A., &  
892 Limoli, D. H. (2021). Sustained coinfections with *Staphylococcus aureus* and *Pseudomonas aeruginosa* in  
893 cystic fibrosis. *American Journal of Respiratory and Critical Care Medicine*, 203(3), 328-338.  
894 <https://doi.org/10.1164/rccm.202004-1322OC>
- 895 Foster, R., Kevin, & Bell, T. (2012). Competition, not cooperation, dominates interactions among culturable microbial  
896 species. *Current Biology*, 22(19), 1845-1850. <https://doi.org/10.1016/j.cub.2012.08.005>

- 897 Fulcher, N. B., Holliday, P. M., Klem, E., Cann, M. J., & Wolfgang, M. C. (2010). The *Pseudomonas aeruginosa*  
898 Chp chemosensory system regulates intracellular cAMP levels by modulating adenylate cyclase activity.  
899 *Molecular Microbiology*, 76(4), 889-904. <https://doi.org/10.1111/j.1365-2958.2010.07135.x>
- 900 Gabriliska, R. A., & Rumbaugh, K. P. (2015). Biofilm models of polymicrobial infection. *Future Microbiology*, 10(12),  
901 1997-2015. <https://doi.org/10.2217/fmb.15.109>
- 902 Hmelo, L. R., Borlee, B. R., Almblad, H., Love, M. E., Randall, T. E., Tseng, B. S., Lin, C., Irie, Y., Storek, K. M.,  
903 Yang, J. J., Siehnel, R. J., Howell, P. L., Singh, P. K., Tolker-Nielsen, T., Parsek, M. R., Schweizer, H. P.,  
904 & Harrison, J. J. (2015). Precision-engineering the *Pseudomonas aeruginosa* genome with two-step allelic  
905 exchange. *Nature Protocols*, 10(11), 1820-1841. <https://doi.org/10.1038/nprot.2015.115>
- 906 Hook, A. L., Flewellen, J. L., Dubern, J. F., Carabelli, A. M., Zaid, I. M., Berry, R. M., Wildman, R. D., Russell, N.,  
907 Williams, P., & Alexander, M. R. (2019). Simultaneous tracking of *Pseudomonas aeruginosa* motility in  
908 liquid and at the solid-liquid interface reveals differential roles for the flagellar stators. *mSystems*, 4(5).  
909 <https://doi.org/10.1128/mSystems.00390-19>
- 910 Hotterbeekx, A., Kumar-Singh, S., Goossens, H., & Malhotra-Kumar, S. (2017). *In vivo* and *in vitro* interactions  
911 between *Pseudomonas aeruginosa* and *Staphylococcus* spp. *Frontiers in Cellular and Infection*  
912 *Microbiology*, 7, 106. <https://doi.org/10.3389/fcimb.2017.00106>
- 913 Hubert, D., Réglie-Poupet, H., Sermet-Gaudelus, I., Ferroni, A., Le Bourgeois, M., Burgel, P.-R., Serreau, R.,  
914 Dusser, D., Poyart, C., & Coste, J. (2013). Association between *Staphylococcus aureus* alone or combined  
915 with *Pseudomonas aeruginosa* and the clinical condition of patients with cystic fibrosis. *Journal of Cystic*  
916 *Fibrosis*, 12(5), 497-503. <https://doi.org/10.1016/j.jcf.2012.12.003>
- 917 Jansari, V. H., Potharla, V. Y., Riddell, G. T., & Bardy, S. L. (2016). Twitching motility and cAMP levels: signal  
918 transduction through a single methyl-accepting chemotaxis protein. *FEMS Microbiology Letters*, 363(12),  
919 fnw119. <https://doi.org/10.1093/femsle/fnw119>
- 920 Kearns, D. B., Robinson, J., & Shimkets, L. J. (2001). *Pseudomonas aeruginosa* exhibits directed  
921 twitching motility up phosphatidylethanolamine gradients. *Journal of Bacteriology*, 183(2), 763-767.  
922 <https://doi.org/10.1128/jb.183.2.763-767.2001>
- 923 Kelly-Wintenberg, K., & Montie, T. C. (1994). Chemotaxis to oligopeptides by *Pseudomonas aeruginosa*. *Applied*  
924 *and Environmental Microbiology*, 60(1), 363-367. <https://doi.org/10.1128/aem.60.1.363-367.1994>
- 925 Kim, J. M., & Baig, C. (2016). Precise analysis of polymer rotational dynamics. *Scientific Reports*, 6(1), 19127.  
926 <https://doi.org/10.1038/srep19127>
- 927 Kuchma, S. L., & O'Toole, G. A. (2022). Surface-induced cAMP signaling requires multiple features of the  
928 *Pseudomonas aeruginosa* type IV pili. *Journal of Bacteriology*, 204(10). [https://doi.org/10.1128/jb.00186-  
929 22](https://doi.org/10.1128/jb.00186-22)
- 930 Kühn, M. J., Talà, L., Inclan, Y. F., Patino, R., Pierrat, X., Vos, I., Al-Mayyah, Z., Macmillan, H., Negrete, J., Engel,  
931 J. N., & Persat, A. (2021). Mechanotaxis directs *Pseudomonas aeruginosa* twitching motility. *Proceedings*  
932 *of the National Academy of Sciences*, 118(30), e2101759118. <https://doi.org/10.1073/pnas.2101759118>
- 933 Kvich, L., Crone, S., Christensen, M. H., Lima, R., Alhede, M., Alhede, M., Staerk, D., & Bjarnsholt, T. (2022).  
934 Investigation of the mechanism and chemistry underlying *Staphylococcus aureus*' ability to inhibit  
935 *Pseudomonas aeruginosa* growth *in vitro*. *Journal of Bacteriology*. <https://doi.org/10.1128/jb.00174-22>

- 936 Limoli, D. H., & Hoffman, L. R. (2019). Help, hinder, hide and harm: what can we learn from the interactions between  
937 *Pseudomonas aeruginosa* and *Staphylococcus aureus* during respiratory infections? *Thorax*, 74(7), 684-  
938 692. <https://doi.org/10.1136/thoraxjnl-2018-212616>
- 939 Limoli, D. H., Warren, E. A., Yarrington, K. D., Donegan, N. P., Cheung, A. L., & O'Toole, G. A. (2019). Interspecies  
940 interactions induce exploratory motility in *Pseudomonas aeruginosa*. *eLife*, 8.  
941 <https://doi.org/10.7554/elife.47365>
- 942 Limoli, D. H., Yang, J., Khansaheb, M. K., Helfman, B., Peng, L., Stecenko, A. A., & Goldberg, J. B. (2016).  
943 *Staphylococcus aureus* and *Pseudomonas aeruginosa* co-infection is associated with cystic fibrosis-related  
944 diabetes and poor clinical outcomes. *European Journal of Clinical Microbiology & Infectious Diseases*,  
945 35(6), 947-953. <https://doi.org/10.1007/s10096-016-2621-0>
- 946 Maliniak, M. L., Stecenko, A. A., & Mccarty, N. A. (2016). A longitudinal analysis of chronic MRSA and  
947 *Pseudomonas aeruginosa* co-infection in cystic fibrosis: a single-center study. *Journal of Cystic Fibrosis*,  
948 15(3), 350-356. <https://doi.org/10.1016/j.jcf.2015.10.014>
- 949 Martín-Mora, D., Ortega, A., Matilla, M. A., Martínez-Rodríguez, S., Gavira, J. A., & Krell, T. (2019). The molecular  
950 mechanism of nitrate chemotaxis via direct ligand binding to the PilJ domain of McpN. *mBio*, 10(1).  
951 <https://doi.org/10.1128/mBio.02334-18>
- 952 Matilla, M. A., Martín-Mora, D., Gavira, J. A., & Krell, T. (2021). *Pseudomonas aeruginosa* as a model to study  
953 chemosensory pathway signaling. *Microbiology and Molecular Biology Reviews*, 85(1).  
954 <https://doi.org/10.1128/membr.00151-20>
- 955 Metzler, R. (2020). Superstatistics and non-Gaussian diffusion. *The European Physical Journal Special Topics*,  
956 229(5), 711-728. <https://doi.org/10.1140/epjst/e2020-900210-x>
- 957 Miller, R. M., Tomaras, A. P., Barker, A. P., Voelker, D. R., Chan, E. D., Vasil, A. I., & Vasil, M. L. (2008).  
958 *Pseudomonas aeruginosa* twitching motility-mediated chemotaxis towards phospholipids and fatty acids:  
959 specificity and metabolic requirements. *Journal of Bacteriology*, 190(11), 4038-4049.  
960 <https://doi.org/10.1128/jb.00129-08>
- 961 Nagel, A. M., Greenberg, M., Shendruk, T. N., & de Haan, H. W. (2020). Collective dynamics of model pili-based  
962 twitcher-mode bacilliforms. *Scientific Reports*, 10(1). <https://doi.org/10.1038/s41598-020-67212-1>
- 963 Nolan, L. M., Mccaughey, L. C., Merjane, J., Turnbull, L., & Whitchurch, C. B. (2020). ChpC controls twitching  
964 motility-mediated expansion of *Pseudomonas aeruginosa* biofilms in response to serum albumin, mucin  
965 and oligopeptides. *Microbiology*, 166(7), 669-678. <https://doi.org/10.1099/mic.0.000911>
- 966 O'Toole, G. A., & Kolter, R. (1998). Flagellar and twitching motility are necessary for *Pseudomonas aeruginosa*  
967 biofilm development. *Molecular Microbiology*, 30(2), 295-304. <https://doi.org/10.1046/j.1365-2958.1998.01062.x>
- 969 O'Neal, L., Baraquet, C., Suo, Z., Dreifus, J. E., Peng, Y., Raivio, T. L., Wozniak, D. J., Harwood, C. S., & Parsek,  
970 M. R. (2022). The Wsp system of *Pseudomonas aeruginosa* links surface sensing and cell envelope stress.  
971 *Proceedings of the National Academy of Sciences*, 119(18). <https://doi.org/10.1073/pnas.2117633119>
- 972 Oliveira, N. M., Foster, K. R., & Durham, W. M. (2016). Single-cell twitching chemotaxis in developing biofilms.  
973 *Proceedings of the National Academy of Sciences*, 113(23), 6532-6537.  
974 <https://doi.org/10.1073/pnas.1600760113>



- 975 Orazi, G., Jean-Pierre, F., & O'Toole, G. A. (2020). *Pseudomonas aeruginosa* PA14 enhances the efficacy of  
976 norfloxacin against *Staphylococcus aureus* Newman biofilms. *Journal of Bacteriology*, 202(18).  
977 <https://doi.org/10.1128/JB.00159-20>
- 978 Orazi, G., & O'Toole, G. A. (2017). *Pseudomonas aeruginosa* alters *Staphylococcus aureus* sensitivity to  
979 vancomycin in a biofilm model of cystic fibrosis infection. *mBio*, 8(4). <https://doi.org/10.1128/mBio>
- 980 Orazi, G., Ruoff, K. L., & O'Toole, G. A. (2019). *Pseudomonas aeruginosa* increases the sensitivity of biofilm-grown  
981 *Staphylococcus aureus* to membrane-targeting antiseptics and antibiotics. *mBio*, 10(4).  
982 <https://doi.org/10.1128/mBio.01501-19>
- 983 Ortega, D. R., Fleetwood, A. D., Krell, T., Harwood, C. S., Jensen, G. J., & Zhulin, I. B. (2017). Assigning  
984 chemoreceptors to chemosensory pathways in *Pseudomonas aeruginosa*. *Proceedings of the National*  
985 *Academy of Sciences*, 114(48), 12809-12814. <https://doi.org/10.1073/pnas.1708842114>
- 986 Parkinson, J. S., Hazelbauer, G. L., & Falke, J. J. (2015). Signaling and sensory adaptation in *Escherichia coli*  
987 chemoreceptors: 2015 update. *Trends in Microbiology*, 23(5), 257-266.  
988 <https://doi.org/10.1016/j.tim.2015.03.003>
- 989 Patteson, A. E., Gopinath, A., Goulian, M., & Arratia, P. E. (2015). Running and tumbling with *E. coli* in polymeric  
990 solutions. *Scientific Reports*, 5(1), 15761. <https://doi.org/10.1038/srep15761>
- 991 Persat, A., Inclan, Y. F., Engel, J. N., Stone, H. A., & Gitai, Z. (2015). Type IV pili mechanochemically regulate  
992 virulence factors in *Pseudomonas aeruginosa*. *Proceedings of the National Academy of Sciences*, 112(24),  
993 7563-7568. <https://doi.org/10.1073/pnas.1502025112>
- 994 Qian, C., Wong, C. C., Swarup, S., & Chiam, K. H. (2013). Bacterial tethering analysis reveals a "run-reverse-turn"  
995 mechanism for *Pseudomonas* species motility. *Applied and Environmental Microbiology*, 79(15), 4734-  
996 4743. <https://doi.org/10.1128/AEM.01027-13>
- 997 Rico-Jiménez, M., Muñoz-Martínez, F., Krell, T., Gavira, J. A., & Pineda-Molina, E. (2013). Purification,  
998 crystallization and preliminary crystallographic analysis of the ligand-binding regions of the PctA and PctB  
999 chemoreceptors from *Pseudomonas aeruginosa* in complex with amino acids. *Acta Crystallographica*  
000 *Section F Structural Biology and Crystallization Communications*, 69(12), 1431-1435.  
001 <https://doi.org/10.1107/s1744309113023592>
- 002 Salah Ud-Din, A. I. M., & Roujeinikova, A. (2017). Methyl-accepting chemotaxis proteins: a core sensing element  
003 in prokaryotes and archaea. *Cellular and Molecular Life Sciences*, 74(18), 3293-3303.  
004 <https://doi.org/10.1007/s00018-017-2514-0>
- 005 Sampedro, I., Parales, R. E., Krell, T., & Hill, J. E. (2015). *Pseudomonas* chemotaxis. *FEMS Microbiology Reviews*,  
006 39(1), 17-46. <https://doi.org/10.1111/1574-6976.12081>
- 007 Shanks, R. M. Q., Caiazza, N. C., Hinsa, S. M., Toutain, C. M., & O'Toole, G. A. (2006). *Saccharomyces cerevisiae*-  
008 based molecular tool kit for manipulation of genes from Gram-negative bacteria. *Applied and Environmental*  
009 *Microbiology*, 72(7), 5027-5036. <https://doi.org/10.1128/aem.00682-06>
- 010 Tashiro, Y., Yawata, Y., Toyofuku, M., Uchiyama, H., & Nomura, N. (2013). Interspecies interaction between  
011 *Pseudomonas aeruginosa* and other microorganisms. *Microbes and Environments*, 28(1), 13-24.  
012 <https://doi.org/10.1264/jsme2.me12167>



- 013 Terwilliger, T. C., Wang, J. Y., & Koshland, D. E. (1986). Kinetics of receptor modification: the multiply methylated  
014 aspartate receptors involved in bacterial chemotaxis. *Journal of Biological Chemistry*, 261(23), 10814-  
015 10820. [https://doi.org/10.1016/s0021-9258\(18\)67460-5](https://doi.org/10.1016/s0021-9258(18)67460-5)
- 016 Turnbull, L., & Whitchurch, C. B. (2014). Motility assay: twitching motility. In *Methods in Molecular Biology* (pp. 73-  
017 86). Springer New York. [https://doi.org/10.1007/978-1-4939-0473-0\\_9](https://doi.org/10.1007/978-1-4939-0473-0_9)
- 018 Verdon, J., Girardin, N., Lacombe, C., Berjeaud, J. M., & Hechard, Y. (2009).  $\delta$ -hemolysin, an update on a  
019 membrane-interacting peptide. *Peptides*, 30(4), 817-823. <https://doi.org/10.1016/j.peptides.2008.12.017>
- 020 Whitchurch, C. B., Leech, A. J., Young, M. D., Kennedy, D., Sargent, J. L., Bertrand, J. J., Semmler, A. B. T.,  
021 Mellick, A. S., Martin, P. R., Alm, R. A., Hobbs, M., Beatson, S. A., Huang, B., Nguyen, L., Commolli, J. C.,  
022 Engel, J. N., Darzins, A., & Mattick, J. S. (2004). Characterization of a complex chemosensory signal  
023 transduction system which controls twitching motility in *Pseudomonas aeruginosa*. *Molecular Microbiology*,  
024 52(3), 873-893. <https://doi.org/10.1111/j.1365-2958.2004.04026.x>
- 025 Wolfgang, M. C., Lee, V. T., Gilmore, M. E., & Lory, S. (2003). Coordinate regulation of bacterial virulence genes  
026 by a novel adenylate cyclase-dependent signaling pathway. *Developmental Cell*, 4(2), 253-263.  
027 [https://doi.org/10.1016/s1534-5807\(03\)00019-4](https://doi.org/10.1016/s1534-5807(03)00019-4)
- 028 Yarrington, K. D., Sánchez Peña, A., & Limoli, D. H. (2020). Kinetic visualization of single-cell interspecies bacterial  
029 interactions. *Journal of Visualized Experiments*, (162). <https://doi.org/10.3791/61376>
- 030 Zarrella, T. M., & Khare, A. (2022). Systematic identification of molecular mediators of interspecies sensing in a  
031 community of two frequently coinfecting bacterial pathogens. *PLOS Biology*, 20(6), e3001679.  
032 <https://doi.org/10.1371/journal.pbio.3001679>
- 033
